## Protein Kinase D promotes activity-dependent AMPA receptor endocytosis in hippocampal neurons

1 **Carlos O. Oueslati Morales<sup>1</sup>, Attila Ignácz<sup>2</sup>, Norbert Bencsik<sup>2</sup>, Anikó Erika Rátkai<sup>2</sup>, Wolfgang**  
2 **S. Lieb<sup>1</sup>, Stephan A. Eisler<sup>1,3</sup>, Attila Szűcs<sup>2</sup>, Katalin Schlett<sup>2</sup>, Angelika Hausser<sup>1,3\*</sup>**

3 <sup>1</sup>Membrane Trafficking and Signalling Group, Institute of Cell Biology and Immunology, University  
4 of Stuttgart, Stuttgart, Germany

5 <sup>2</sup>Neuronal Cell Biology Group, Department of Physiology and Neurobiology, Eötvös Loránd  
6 University, Budapest, Hungary

7 <sup>3</sup>Stuttgart Research Center Systems Biology, University of Stuttgart, Stuttgart, Germany

8

### 9 **\*Correspondence:**

10 Angelika Hausser

11 Institute of Cell Biology and Immunology

12 University of Stuttgart,

13 Allmandring 31

14 70569 Stuttgart

15 Germany

16 [angelika.hausser@izi.uni-stuttgart.de](mailto:angelika.hausser@izi.uni-stuttgart.de)

17 Phone: +49 711 685 66995

18 Fax: +49 711 685 67484

19 **Running title:** PKD promotes AMPA receptor endocytosis

20 **Keywords:** AMPA receptor, GluA1, endocytosis, chemically induced LTD, PKD

### 21 **List of Abbreviations:**

22 AD – Alzheimer's Disease, AMPA –  $\alpha$ -amino-3-hydroxy-5-methyl-4-isoxazolepropionic acid,  
23 AMPAR – AMPA receptor, BCP – Burst Cycle Period, CaMKs – Calcium/calmodulin-dependent  
24 protein kinases, caPKD – constitutively active PKD, CI – Confidence Interval, cLTD – chemical LTD,  
25 CRT – CRT0066101, DIV – Days In Vitro, EEA1 – Early Endosome Antigen 1, EGFP – Enhanced  
26 Green Fluorescent Protein, FBS – Fetal Bovine Serum, FRAP – Fluorescence Recovery After  
27 Photobleaching, GEF – Guanosine Exchange Factor, ISI – Inter Spike Time Interval, kdPKD – kinase  
28 dead PKD, LTD – Long-term depression, LTP – Long-term potentiation, MEA – Multi-Electrode  
29 Array, PKA – Protein kinase A, PKC – Protein kinase C, PKD – Protein kinase D, pS831GluA1 –  
30 phospho-serine 831 GluA1, pS845GluA1 – phospho-serine 845 GluA1, pS916PKD – phospho-serine  
31 916 PKD, PSD – Post Synaptic Density, GluA1-SEP – Super Ecliptic pFluorin GluA1

32

### 33 **ORCID ID**

34 Carlos O. Oueslati Morales – <https://orcid.org/0000-0002-3038-5365>

35 Attila Ignacz – <https://orcid.org/0000-0002-2930-1582>

36 Norbert Bencsik - <https://orcid.org/0000-0001-9553-3851>

37 Aniko Erika Ratkai - <https://orcid.org/0000-0002-5385-5198>  
38 Wolfgang-Sebastian Lieb - <https://orcid.org/0000-0001-8412-5940>  
39 Attila Szucs – <https://orcid.org/0000-0001-9733-4135>  
40 Katalin Schlett - <https://orcid.org/0000-0001-9265-4236>  
41 Angelika Hausser - <https://orcid.org/0000-0002-4102-9286>  
42

43

44

45

46

47

48

49

50

51

52

53

54

55

56

57

58

59

60

61

62

63

64

## 65 **Abstract**

66 AMPA type glutamate receptors (AMPA) mediate the majority of fast excitatory neurotransmission  
67 in the brain. The continuous trafficking of AMPARs into and out of synapses is a core feature of  
68 synaptic plasticity, which is considered as the cellular basis of learning and memory. The molecular  
69 mechanisms underlying the postsynaptic AMPAR trafficking, however, are still not fully understood.  
70 In this work, we demonstrate that the Protein Kinase D (PKD) family promotes basal and activity-  
71 induced AMPAR endocytosis in primary hippocampal neurons. Pharmacological inhibition of PKD  
72 increased synaptic levels of GluA1-containing AMPARs, slowed down their endocytic trafficking and  
73 increased neuronal network activity. By contrast, ectopic expression of constitutive active PKD  
74 decreased the synaptic level of AMPARs, while increasing their co-localization with early endosomes.  
75 Our results thus establish an important role for PKD in the regulation of postsynaptic AMPAR  
76 trafficking during synaptic plasticity.

## 77 **Introduction**

78 Synaptic plasticity describes a process where synaptic strength is changed in an activity-dependent  
79 manner within the brain. The most widely investigated forms of long-term synaptic changes include  
80 long-term potentiation (LTP) and long-term depression (LTD), which are thought to present the cellular  
81 mechanisms of learning and memory (Malinow & Malenka 2002; Hugarir & Nicoll 2013). One of the  
82 key elements in the control of synaptic strength is the dynamic alteration in the number and  
83 composition of the ionotropic AMPA-type glutamate receptors (AMPA) within the postsynaptic  
84 membrane (Malinow & Malenka 2002; Hugarir & Nicoll 2013; Chater & Goda 2014).

85 AMPARs are tetramers composed of four different subunits, GluA1-GluA4. Binding of glutamate  
86 allows the opening of the ion channel and the subsequent influx of Na<sup>+</sup> (and potentially Ca<sup>2+</sup>) and  
87 efflux of K<sup>+</sup>, causing membrane depolarization. Thus, the main function of AMPARs is to mediate  
88 excitatory neurotransmission in the brain (Chater & Goda 2014; Diering & Hugarir 2018). The  
89 heterotetramer GluA1/2 is the most abundant variant followed by GluA2/3, while the GluA4 subunit  
90 is expressed mainly during early development and is present only at low levels in the adult brain  
91 (Henley & Wilkinson 2013; Lu *et al.* 2009; Zhu *et al.* 2000). GluA1-containing AMPARs leave the  
92 endoplasmic reticulum rapidly and are trafficked towards the synaptic plasma membrane. Plasma  
93 membrane insertion is thought to happen mostly within the extra- or perisynaptic regions, followed by  
94 lateral movement of AMPARs into the synapse. Within the synaptic membrane, AMPARs are  
95 stabilized by postsynaptic density (PSD) scaffolding proteins in an activity-dependent manner (Greger  
96 *et al.* 2002; Henley & Wilkinson 2013; Makino & Malinow 2009; Pick & Ziff 2018). Synaptic  
97 AMPARs are constitutively recycled through endocytic trafficking pathways: AMPARs are  
98 internalized from the cell surface at perisynaptic endocytic zones. Subsequently, AMPARs are  
99 trafficked to early endosomes and either recycled back to the plasma membrane or transported to  
100 dendritic lysosomes and degraded (Blanpied *et al.* 2002; van der Sluijs & Hoogenraad 2011; Luscher  
101 *et al.* 1999; Ehlers 2000). During LTD and LTP, endocytotic and exocytotic AMPAR trafficking is  
102 imbalanced, resulting in reduced and enhanced numbers of AMPARs at the synapse, respectively  
103 (Carroll *et al.* 1999; Ehlers 2000; Hayashi *et al.* 2000; Shi *et al.* 1999).

104 The protein kinase D (PKD) family of serine/threonine kinases belongs to the calcium/calmodulin-  
105 dependent protein kinases (CaMKs) superfamily, and comprises three isoforms in mammals: PKD1,  
106 PKD2 and PKD3, all of which are expressed in neurons from a very early embryonic stage (Ellwanger  
107 & Hausser 2013; Oster *et al.* 2006). PKDs are recruited to the plasma membrane or to different  
108 organelles, such as the Golgi complex, by binding to diacylglycerol. Upon activation, they control

109 different intracellular processes such as vesicle fission from the Golgi complex and rearrangement of  
110 the actin cytoskeleton (reviewed in (Olayioye *et al.* 2013; Reinhardt *et al.* 2020)). In breast cancer cells,  
111 PKD-mediated phosphorylation of Rabaptin-5, a binding partner for both Rab4 and Rab5, is required  
112 to shunt integrin  $\alpha_v\beta_3$  to the short recycling loop, indicating a role for the kinase in endocytic trafficking  
113 processes (Christoforides *et al.* 2012; Woods *et al.* 2004). In neurons, PKD plays a key role in the  
114 establishment and maintenance of polarity through controlling the integrity of the Golgi complex and  
115 trans-Golgi network-derived sorting of vesicles (Bisbal *et al.* 2008; Czondor *et al.* 2009; Yin *et al.*  
116 2008). Furthermore, we recently demonstrated a role for PKD in learning and memory through  
117 stabilization of plasticity-induced actin rearrangements (Bencsik *et al.* 2015). However, so far PKD  
118 has not been linked to AMPAR trafficking in neuronal cells.

119 Here, we identify PKD as a regulator of basal and activity-mediated GluA1 endocytosis in cultured  
120 hippocampal neurons. We provide evidence that PKD is activated downstream of chemically induced  
121 GluA1 endocytosis. Inhibition of PKD increases surface and synaptic levels of GluA1 and  
122 consequently, neuronal network activity. We further show that expression of constitutive active PKD  
123 (caPKD) decreases the synaptic amount of GluA1 while increasing the localization of GluA1 at early  
124 endosomes. Importantly, PKD inhibition blocks the endocytosis of GluA1 upon chemically evoked  
125 LTD (cLTD). Combined, our data identify a previously unknown role of the PKD family in the  
126 regulation of AMPAR endocytosis in cultured hippocampal neurons.

## 127 **Material and methods**

### 128 **Animal handling**

129 Female pregnant CD1 mice (Charles River) were kept alone in type 2 cages (Zoonlab #3010010) in  
130 the animal facility of the Institute of Cell Biology and Immunology, University of Stuttgart; or of the  
131 Biological Institute, Eötvös Loránd University, at  $22 \pm 1^\circ\text{C}$  with 12 h light and dark cycles and ad  
132 libitum access to water and food. The animals were maintained and handled in accordance with the  
133 Guidelines for Accommodation and Care of Animals, according to the European Convention for the  
134 Protection of Vertebrate Animals Used for Experimental and Other Scientific Purposes.

### 135 **Cell culture**

136 Primary cultures of embryonic hippocampal cells were prepared from CD1 mice on embryonic day  
137 E17.5-E18.5. In brief, E 17.5-18.5 pregnant female CD1 mice were sacrificed by means of CO<sub>2</sub>  
138 intoxication, and subsequently the hippocampi were aseptically removed from the skull of the embryos.  
139 Tissue was then freed from meninges and incubated in 0.05% trypsin-EDTA (ThermoFisher Scientific  
140 #15400-054) solution with 0.05% DNaseI (Sigma-Aldrich #D5025) in PBS for 15 min at 37°C. After  
141 a brief centrifugation, cells were disaggregated in NeuroBasal culture medium (ThermoFisher  
142 Scientific, #21103049) supplemented with B27 (ThermoFisher Scientific, #17504044), 5% fetal  
143 bovine serum (PAN Biotech #P30-3309), 0.5 mM GlutaMAX (ThermoFisher Scientific, #35050-038),  
144 40  $\mu\text{g}/\text{ml}$  gentamycin (Sigma, #G1397) and 2.5  $\mu\text{g}/\text{ml}$  amphotericin B (Gibco, #15290-026) and  
145 filtered through a sterile polyester mesh with 42- $\mu\text{m}$  pore size (EmTek, Budapest, Hungary). Cell  
146 number was determined by trypan blue exclusion, and cells were seeded in supplemented NeuroBasal  
147 on poly-L-lysine-coated (PLL, Sigma #5899), 6 well plates (Greiner Bio-One, #657160) or 35 mm  
148 petri dishes (Greiner Bio-One, #627160) at a density of  $4 \times 10^5$  cells/well. For imaging, cells were  
149 seeded on PLL/laminin-coated (Sigma; #L2020) glass coverslips (Carl Roth, #YX03.1) in 24-well  
150 plates or on glass bottom petri-dishes (Greiner Bio-One, #627870) at a density of  $1.15 \times 10^5$  cells/well.  
151 Five days after plating, half of the original NeuroBasal culture medium (ThermoFisher Scientific,

152 #21103049) supplemented with B27 (ThermoFisher Scientific, #17504044) was changed to Brainphys  
153 (Stemcell technologies, #05790) supplemented with SM1 (Stemcell technologies, #05711),  
154 gentamycin and amphotericin B, containing 10  $\mu$ M cytosin-arabinofuranoside (Sigma, #C6645). The  
155 cells were cultivated for 13 days at 37°C in 5% CO<sub>2</sub>, and one half of the Neurobasal media was  
156 exchanged by fresh supplemented Brainphys every 3 days. Chemically-induced Long Term Depression  
157 (cLTD) was induced by treating the neuronal cultures with 50  $\mu$ M NMDA (Sigma, #M3262) for 5 min  
158 in conditioned medium. Then, cells were changed to a NMDA-free medium, and incubated for 15 min  
159 before being further processed. Agonist-induced AMPAR endocytosis was performed by treating the  
160 neuronal cultures with 100  $\mu$ M S-AMPA (Hello Bio, #HB0052) and 50  $\mu$ M D-AP5 (Tocris #3693) for  
161 2 minutes in conditioned medium. Afterwards, cells were changed to an AMPA- and D-AP5-free  
162 medium and incubated for 10 minutes before being further processed.

### 163 **Chemical treatments, cell surface staining and biotinylation**

164 PKD activity was blocked with CRT0066101 (CRT, Tocris #4975) (Harikumar *et al.* 2010) diluted in  
165 dimethyl sulfoxide (DMSO), at a final concentration of 2  $\mu$ M. For surface biotinylation of endogenous  
166 GluA1, 13-day-old neuronal cultures were placed on ice (13 days in vitro; DIV13), washed twice with  
167 calcium- and magnesium-containing phosphate-buffered saline (PBSCM, ThermoFisher Scientific,  
168 #14040-091) and incubated with 1.5 mg/ml sulfo-NHS-SS-biotin (ThermoFisher Scientific, #21331)  
169 diluted in PBSCM for 15 min. Afterwards, cultures were washed twice with 20 mM glycine (Roth,  
170 #HN07.1) in PBSCM for 7 min, to bind free biotin; before being finally lysed. To visualize cell surface  
171 GluA1, we modified an assay from a published protocol (Sziber *et al.* 2017). In brief, neuronal cultures  
172 were incubated with an N-terminal-specific GluA1 antibody (1:100, Millipore, #MAB2263,  
173 RRID:AB\_11212678) in conditioned media for 10 min at 37 °C and 5% CO<sub>2</sub> in a humidified  
174 atmosphere. Afterwards, cells were washed with PBS and fixed with 4% paraformaldehyde (PFA) in  
175 PBS for 10 min at room temperature (RT) without permeabilization. After 1 h of blocking with 5%  
176 FBS and 0.1% NaN<sub>3</sub> in PBS, a secondary anti-mouse antibody labelled with Alexa 546 (1:500, Thermo  
177 Fisher Scientific, #A11030, RRID:AB\_2534089) was applied to the cells for 1h at RT. Cells were  
178 washed and fixed again with 4% PFA in PBS for 10 min and further processed for Shank2 staining  
179 (see section Immunostaining and confocal laser scanning microscopy). Samples were mounted in  
180 ProLong Gold Antifade Mountant (ThermoFisher Scientific, #P36930) and analyzed by confocal laser  
181 scanning microscopy.

182 To analyze the amount of endocytosed AMPAR, biotinylation assays of receptor internalization were  
183 employed as described (Ehlers 2000). In brief, protein lysosomal degradation was inhibited with 100  
184  $\mu$ g/ml Leupeptin (Tocris, #1167) for 1h; then cells were placed on ice and incubated with 1.5 mg/ml  
185 Sulfo-NHS-SS-biotin (ThermoFisher Scientific, #21331) for 1 h. Subsequently, cells were transferred  
186 to biotin-free medium and treated with 100  $\mu$ M S-AMPA and 50  $\mu$ M D-AP5 for 2 min. Then, cells  
187 were returned to an AMPA- and D-AP5 free medium for 10 min to allow for endocytosis, subsequently  
188 placed again on ice and washed twice with cold PBSCM. Remaining surface biotin was cleaved by  
189 incubation with glutathione cleavage buffer (50 nM L-Glutathione (Sigma #G6013) 75 mM NaCl, 10  
190 mM EDTA, 1% BSA, pH 8.6) for 15 min. Finally, cells were washed twice and further processed for  
191 protein extraction.

### 192 **Protein extraction, biotin pulldowns and Western Blotting**

193 Neuronal cells were harvested in cold lysis buffer (1% Triton X-100, 20 mM Tris pH 7.5, 150 mM  
194 NaCl, 1mM EDTA, 1 mM EGTA; 4°C) supplemented with protease (Roche, #11697498001) and  
195 phosphatase inhibitors (Roche, #04906845001), and subsequently centrifugated at 13000 x g for 10

196 min. For the biotin pulldowns, equal amounts of cell lysate were incubated with avidin-coated agarose  
197 beads (Thermo Scientific, #29201) for 90 min at 4°C and washed 4 times with lysis buffer. Equal  
198 amounts of protein were run on NuPage Novex 4-12% Bis-Tris gels (Thermo Fisher Scientific,  
199 #NP0322BOX) and blotted onto nitrocellulose membranes using the iBlot device (ThermoFisher  
200 scientific, #IB1001). Membranes were blocked for 30 min with 0.5% (v/v) blocking reagent (Roche,  
201 #11096176001) in PBS containing 0.05% Tween 20 and 0.1% NaN<sub>3</sub>, and subsequently incubated with  
202 primary antibodies overnight at 4°C (anti-PKD1 (1:1000, Cell Signaling Technology #2052,  
203 RRID:AB\_2172539), anti-pS916PKD (1:1000, CST #2051, RRID:AB\_330841), anti-actin (1:1000,  
204 Sigma-Aldrich #A4700, RRID:AB\_476730), anti-GluA1 (1:1000, Millipore #MAB2263,  
205 RRID:AB\_11212678), anti-pS831GluA1 (1:1000, Cell Signalling Technology #75574,  
206 RRID:AB\_2799873), anti-GFP (1:2000, Roche #11814460001, RRID:AB\_390913)). The next day,  
207 membranes were washed and incubated with HRP-conjugated secondary anti-mouse and anti-rabbit  
208 antibodies at RT for 1 h (1:10000, Jackson ImmunoResearch Labs #115-035-062, RRID:AB\_2338504  
209 or #111-035-144, RRID:AB\_2307391) before being washed again and finally visualized using the  
210 SuperSignal West Pico PLUS or the SuperSignal West Dura Extended Duration substrates (Thermo  
211 Fisher Scientific, #34580 or #34076). Proteins were visualized using the Amersham Imager 600, an  
212 enhanced chemiluminescence detection system (Thermo Fisher Scientific, Waltham, MA, USA).  
213 Quantitative Western Blotting chemiluminescence was detected at a depth of 16-bit in the linear  
214 detection range of the device, equipped with a 3.2-megapixel super-honeycomb CCD camera fitted  
215 with a large aperture f/0.85 FUJINON lens. Special care was taken not to overexpose in order to  
216 guarantee accurate quantifications. Densitometry was performed using Image Studio Lite 5.2 (Image  
217 Studio Lite, RRID:SCR\_013715). For each protein, the integrated density of the signal was measured,  
218 corrected for background signals and adjusted to loading controls.

## 219 **Transfection and expression constructs**

220 On DIV12, neuronal cultures were transfected using Lipofectamine 2000 (Invitrogen, #11668-019)  
221 according to the manufacturer's instructions. In brief, 0.5 µg of plasmid DNA was mixed with  
222 Lipofectamine 2000 in a 1 µg: 2 µl ratio. Medium was changed 4 h after transfection to the original  
223 cultivation medium and cells were incubated overnight. The enhanced green fluorescent protein  
224 (EGFP) vector was obtained from Clontech Europe, whereas the pcDNA3-mRuby2 was a gift from  
225 Michael Lin (Addgene plasmid #40260; <http://n2t.net/addgene:40260>; RRID:Addgene\_40260) and  
226 pCI-SEP-GluR1 was a gift from Robert Malinow (Addgene plasmid #24000;  
227 <http://n2t.net/addgene:24000>; RRID:Addgene\_24000) (Kopec *et al.* 2006). caPKD1-EGFP and  
228 caPKD1-Flag have already been described elsewhere (Hausser *et al.* 2002).

## 229 **Immunostaining and confocal laser scanning microscopy**

230 Hippocampal cultures were fixed on DIV13 for 20 min with 4% PFA in PBS. After washing with PBS,  
231 cells were permeabilized with 0.1% Triton X-100 in PBS for 5 min. Cells were again washed with PBS  
232 and blocked with 5% FBS and 0.1% NaN<sub>3</sub> in PBS for 1 h at RT. Subsequently, the corresponding  
233 primary antibody (anti-Shank2 (1:2000, Synaptic Systems #162 204, RRID:AB\_2619861), anti-GluA1  
234 (1:500, Millipore #MAB2263, RRID:AB\_11212678), anti-EEA1 (1:100, Cell Signalling Technology  
235 #3288, RRID:AB\_2096811)) was diluted in blocking buffer and incubated for 1.5 h at RT. Cells were  
236 washed with PBS, and Alexa-Fluor-(488, 546 or 633) labelled secondary antibodies (ThermoFisher  
237 Scientific #A-11029, RRID:AB\_2534088; #A-11030, RRID:AB\_2534089 and #A-21052,  
238 RRID:AB\_2535719, respectively) were diluted 1:500 in blocking buffer and incubated for 1 h at RT.  
239 Finally, samples were mounted in ProLong Gold Antifade. All samples were imaged using a confocal  
240 laser scanning microscope (LSM 710, Carl Zeiss) equipped with either a Plan Apochromat 63x/1.40

241 DIC M27 or an alpha Plan-Apochromat 100x/1.46 Oil DIC objective (Carl Zeiss), using sequential  
242 excitation with an 488 nm Argon laser, an 561 DPSS laser or an 633 nm HeNe laser. Image acquisition  
243 for the quantitative measurement of GluA1 intensity was done as follows: z-stacks of 0.32  $\mu\text{m}$  intervals  
244 were acquired throughout the selected neuronal branches of at least 20  $\mu\text{m}$  in length. Image processing  
245 and analysis were performed with either ZEN blue (ZEN Digital Imaging for Light Microscopy,  
246 RRID:SCR\_013672) or with ImageJ (Image J, RRID:SCR\_003070). Regions of interests were selected  
247 manually according to clear Shank2 immunopositivity at the plasma membrane along the shaft or  
248 within dendritic spines. Mean pixel intensity values of the GluA1 channel within the selected regions  
249 of interests were measured, background corrected and normalized to the staining intensity in the control  
250 condition. In order to analyze the co-localization between GluA1 and EEA1 signals, single images of  
251 selected neuronal branches were acquired. In all experiments, laser power was set so that there would  
252 be no saturation and maintained constant throughout the analyses of different samples from the same  
253 experiment. Image processing and analysis was performed with ZEN blue and ImageJ. The Mander's  
254 overlap coefficient of GluA1 with EEA1 was calculated and used as a measure of co-localization using  
255 the ImageJ plugin JACoP.

### 256 **Fluorescence recovery after photobleaching (FRAP)**

257 To investigate AMPAR trafficking to and from the plasma membrane, neuronal cultures were  
258 transfected with the super ecliptic pHluorin-tagged GluA1 (GluA1-SEP) and mRuby2 plasmids in a  
259 5:3 ratio and incubated overnight. On the next day, culture medium was changed to pre-heated live cell  
260 imaging buffer containing 142 mM NaCl, 5.4 Mm KCl, 1.8 mM CaCl<sub>2</sub>, 1 mM NaH<sub>2</sub>PO<sub>4</sub>, 0.8 mM  
261 MgSO<sub>4</sub>, 5 mM glucose and 25 mM HEPES with a pH of 7.4. The diffusion mobility of the GluA1-  
262 containing AMPARs was analyzed at 37°C and 5% CO<sub>2</sub> on a Zeiss Axio Observer Spinning Disc  
263 Microscope, using an alpha Plan-Apochromat 100x/1.46 Oil DIC objective and a Photometrix Evolve  
264 512 EMCCD camera for image acquisition. Photobleaching was executed with a UGA-42 firefly  
265 photomanipulation system equipped with a 100 mW 473 nm laser (Rapp OptoElectronic, Germany).  
266 Cells were initially treated with 2  $\mu\text{M}$  of CRT for 10 min, then selected dendritic spines were bleached  
267 with a high-intensity laser light (473 nm line, 10% laser power). Fluorescence intensity in the bleached  
268 areas was measured over time both before and after the bleaching event, taking images every 30  
269 seconds for approx. 25 min. Intensity values were corrected with the background intensity values and  
270 normalized to the unbleached region. Fitting of the curves was performed with a one-phase exponential  
271 equation  $Y = Y_0 + (Plateau - Y_0) * (1 - \exp(-K * x))$ ; Prism 8, (GraphPad Prism,  
272 RRID:SCR\_002798).

### 273 **MEA recording and analysis**

274 For extracellular voltage recording, hippocampal cell cultures were seeded into PLL/laminin coated  
275 Axion 24-well BioCircuit (M384-tMEA24W) and 48-well CytoView (M768-tMEA-48B) MEA plates  
276 in a density of  $1.5 \times 10^5$  and  $4 \times 10^4$  cells per well, respectively. Five days after plating, half of the culture  
277 medium was changed to Brainphys supplemented with SM1, gentamycin and amphotericin B, and  
278 treated with cytosin-arabinofuranoside. At 12-14 days in vitro, baseline neuronal activity was recorded  
279 for 5 minutes by the Maestro Pro recording system (Axion Biosystems) or by a custom-made recording  
280 hardware (APPERCELL Biotech Ltd., Hungary), followed by DMSO, CRT and cLTD treatments as  
281 described above. 5 minutes long recordings were analysed between 10 to 15 minutes and 90 to 95  
282 minutes following the corresponding treatments. Action potentials from raw voltage recordings were  
283 detected by the Axion AxIS Navigator software or by the custom-written software "Neuroexpress"

284 developed by A. Szűcs<sup>1</sup>. Spike arrival time data were analysed by the NeuroExpress software using a  
285 variety of tools including inter-spike time intervals (ISI) and burst cycle periods (BCP) as measures of  
286 the general intensity of neuronal activity. Bursts were defined as clusters containing at least 3 action  
287 potentials with adjacent spikes occurring within 460 ms. Burstiness, a dimensionless parameter was  
288 used to describe the overall clustering and separation of burst episodes in the firing pattern. To calculate  
289 this parameter, first we identified the smaller of the 2 interburst intervals either preceding or following  
290 the actual burst event. Next, we determined the arithmetic mean of the smallest and longest intraburst  
291 ISI for the burst. Burstiness was then calculated by dividing the smaller interburst interval by the mean  
292 ISI and subtracted 1 from the resulting fraction. Burstiness, therefore, was obtained for each burst event  
293 in the spike train. This parameter yields zero for periodic firing (pacemaker pattern), while increasingly  
294 higher values are obtained when the firing becomes more clustered.

## 295 **Statistical analysis of the data**

296 For statistical evaluation, the normality of the data was routinely tested using the Shapiro-Wilk  
297 normality test. For the comparison of two groups, a t test was employed, whereas to compare three or  
298 more groups, a one-way ANOVA was performed followed by a post-hoc test. No test for outliers was  
299 conducted and no data points were excluded. Statistical analysis was tested employing GraphPad Prism  
300 8 software. Data are displayed as mean  $\pm$  SEM, mean  $\pm$  95% confidence interval (CI) or Tukey's box-  
301 and-whiskers plots.

## 302 **Ethical approval**

303 All applicable international, national, and/or institutional guidelines for the care and use of animals  
304 were followed. The animal experiments conducted in Stuttgart and Budapest were reviewed and  
305 approved by the Regierungspräsidium Stuttgart and by the Animal Ethics Committee of Eötvös Loránd  
306 University (approval number: PEI/001/1108-4/2013 and PEI/001/1109-4/2013), respectively. This  
307 article does not contain any studies with human participants performed by any of the authors.

308

## 309 **Results**

### 310 **AMPA basal trafficking is regulated by PKD**

311 AMPAR surface expression and recycling are highly dynamic, with a half-time in the range of minutes  
312 (Henley & Wilkinson 2013). To address the role of PKD in basal AMPAR trafficking, we thus  
313 subjected hippocampal neurons to an acute, short-term PKD inhibition (10 min) using CRT0066101  
314 (referred to as CRT), a potent and selective pan-inhibitor of all PKD isoforms (Harikumar *et al.* 2010;  
315 Borges *et al.* 2015; Lieb *et al.* 2020; Zhang *et al.* 2017). In order to prove that this short-term treatment  
316 with CRT effectively inhibits PKD activity, we analyzed autophosphorylation of PKD at serine 916  
317 (pS916PKD) immediately following CRT treatment, as an indicator of kinase activity (Matthews *et al.*  
318 1999) along with the total levels of PKD (Figure 1a). In line with our previous results (Czondor *et al.*  
319 2009), we show that endogenous PKD is active in cultured hippocampal neurons under basal  
320 conditions. We further detect a strong and significant decrease in the relative level of pS916PKD in

---

<sup>1</sup> ResearchGate. (2018). NeuroExpress: Analysis software for whole-cell electrophysiological data.  
<https://www.researchgate.net/project/NeuroExpress-Analysis-software-for-whole-cell-electrophysiological-data>.  
[Accessed October 26, 2020].



321 CRT treated cells compared to the DMSO treated control (Figure 1a, b), confirming the efficacy of the  
322 inhibitor under these conditions.

323 Next, to assess the surface expression of GluA1-containing AMPARs in hippocampal neurons treated  
324 with CRT or the solvent DMSO, we utilized cell surface protein tagging using sulfo-NHS-SS-biotin.  
325 After cell lysis, biotinylated proteins were precipitated and the total expression and surface levels of  
326 GluA1 were detected by Western Blot analysis (Figure 1c). Our data clearly indicate that already a  
327 short-term PKD inhibition significantly increased the relative amount of surface GluA1 compared to  
328 the DMSO treatment (Figure 1d).

329 Under basal conditions, AMPARs have a high turnover within spines (Passafaro *et al.* 2001; Shi *et al.*  
330 2001) and are internalized in the vicinity of synapses (Rosendale *et al.* 2017). To investigate whether  
331 short-term PKD inhibition affects the amount of GluA1 within the close vicinity of the postsynaptic  
332 membrane, we treated hippocampal cultures with CRT or DMSO, and subsequently incubated the cells  
333 with an antibody detecting the extracellular N-terminal domain of GluA1. Cells were then fixed and  
334 incubated with a fluorescently labelled secondary antibody without permeabilization to visualize  
335 GluA1 subunits within the plasma membrane. Subsequently, cell membrane was permeabilized and  
336 cells were additionally immunostained for Shank2, a marker of the PSD (Naisbitt *et al.* 1999) (Figure  
337 1e). Notably, our analysis reveals that inhibition of PKD significantly increased GluA1 intensity within  
338 Shank2-positive areas compared to the control (Figure 1f). Vice versa, transfection of hippocampal  
339 cells with a plasmid encoding a constitutively active S738/742E mutant form of PKD (caPKD-EGFP)  
340 significantly decreased the amount of GluA1 in Shank2 positive areas compared to cells transfected  
341 with EGFP as control (Figure 1 g, h).

342 To measure the impact of PKD inhibition on spontaneous neuronal activity, we cultivated hippocampal  
343 neurons on transparent Multi-electrode Array (MEA) plates containing 16 electrodes per well (see  
344 Figure 2a). Neurons at DIV14-15 were treated with DMSO or CRT for 10 min and subsequent  
345 extracellular voltage recordings were compared to baseline activity (Figure 2b). Short-term inhibition  
346 of PKD by CRT resulted in a significant decrease in interspike intervals compared to pre-treatment,  
347 basal values while spontaneous firing activity was not changed in DMSO-treated cultures (Figure 2c).  
348 Accordingly, when the effects of DMSO and CRT treatments were normalized to their corresponding  
349 baseline activity, CRT treatment significantly increased firing activity as interspike intervals were  
350 reduced (Figure 2d). In addition, 10 min CRT treatment significantly increased burstiness – a  
351 dimensionless parameter to describe the overall clustering of burst episodes - compared to basal values  
352 (Figure 2e) or to DMSO treatment (Figure 2f).

353 Hence, our data provide compelling evidence that PKD activity regulates the amount and PSD  
354 localization of GluA1-containing AMPARs in synapses and decreases spontaneous network activity  
355 under basal conditions.

356

### 357 **PKD controls basal AMPAR endocytosis**

358 To further investigate how PKD controls AMPAR trafficking, we measured fluorescence recovery  
359 after photobleaching (FRAP) of Super Ecliptic pHluorin (SEP)-tagged GluA1. SEP emits fluorescence  
360 under neutral pH conditions, allowing for the study of specific subpopulations of the tagged protein at  
361 the cell surface in relation to those fluorochromes which are internalized within vesicles (Kopeck *et al.*  
362 2006). Cultures were co-transfected with mRuby2 to visualize transfected neuronal cells. Neurons were  
363 treated with either CRT or DMSO for 10 min, then the fluorescent signal within the dendritic spines of  
364 imaged dendritic branches was bleached and the recovery of the fluorescence intensity was measured

365 for another 10 min (Figure 3a, b). To calculate the recovery half-time and the mobile fraction of GluA1-  
366 SEP, we additionally fitted the recovery curves with a one-phase exponential equation (Figure 3c). In  
367 DMSO treated neurons, photobleaching of spine SEP fluorescence to background levels was followed  
368 by a fast recovery ( $t_{1/2} = 14.52$  seconds with 95% CI of  $\pm 15.08$  CI, Figure 3d) to 61.16% with a 95%  
369 CI of  $\pm 3.4$  of the original GluA1-SEP intensity after 183 seconds (Figure 3e). Upon PKD inhibition,  
370 GluA1-SEP signal within the spines recovered significantly slower ( $t_{1/2} = 114.47$  seconds with 95% CI  
371 of 77.67 and 38.26, Figure 3d), albeit to the same level as the control (Fig. 3b, c). Consequently, the  
372 mobile fraction of GluA1-SEP did not significantly change between the CRT and DMSO treated  
373 cultures (Figure 3e). The timescale of GluA1-SEP signal recovery depends on the net effects of lateral  
374 diffusion of plasma-resident, non-bleached GluA1-SEP subunits and on the rate of endocytic removal  
375 of bleached GluA1-SEP from the cell surface. Thus, our results suggest that PKD inhibition slows  
376 down the trafficking of cell surface GluA1-SEP.

377 It is well established that constitutive endocytosis at perisynaptic zones regulates the number of  
378 AMPARs within the postsynaptic membrane (Ehlers 2000; Luscher *et al.* 1999; Rosendale *et al.* 2017;  
379 Man *et al.* 2000). Furthermore, under basal conditions, AMPARs undergo a robust time-dependent  
380 endocytosis (Ehlers 2000). To clarify whether PKD is involved in basal AMPAR endocytosis, we  
381 firstly investigated whether PKD short-term inhibition affects basal trafficking of AMPARs to early  
382 endosomes. To that end, neuronal cells expressing EGFP or caPKD-EGFP were treated with CRT or  
383 DMSO, fixed, permeabilized and stained for GluA1 and EEA1, a marker of early endosomes (Mu *et al.*  
384 *et al.* 1995). EEA1 and GluA1 were present on dot-like structures distributed all over the dendritic branch  
385 (Figure 3f). This is in line with earlier reports showing that EEA1 participates in the endocytosis of  
386 AMPARs and is highly expressed in the postsynaptic compartment of hippocampal synapses (Selak *et al.*  
387 *et al.* 2006; Selak *et al.* 2000). To assess whether the amount of GluA1 at early endosomes changes upon  
388 increased PKD activity, we compared the co-localization of GluA1 and EEA1 by analyzing the  
389 Mander's coefficient (Figure 3g) in EGFP or caPKD-EGFP expressing neurons. Our data show that  
390 constitutively active PKD significantly enhances the amount of GluA1 at early endosomes. This was  
391 reverted to the control level when cells were treated with CRT for 10 minutes prior to fixation.

392 To corroborate our finding on AMPAR endocytosis, we studied the phosphorylation of GluA1 at S831  
393 and S845 depending on PKD activity. S831 phosphorylation is mediated by CaMKII and Protein  
394 Kinase C (PKC), promoting the targeting of GluA1 to the PSD and increasing single channel  
395 conductance (Barria *et al.* 1997; Diering *et al.* 2016; Roche *et al.* 1996) whereas phosphorylation of  
396 S845 is mediated by Protein Kinase A (PKA), leading to an increased single-channel open probability  
397 and to targeting or retention of GluA1 at the cell surface (Banke *et al.* 2000; Man *et al.* 2007; Diering  
398 & Huganir 2018). Cells were treated with CRT or DMSO for 10 min, lysed and both the total and  
399 phosphorylated levels of GluA1 were measured via Western Blot (Figure 3h and j). Remarkably, while  
400 short-term inhibition of PKD did not modify basal pS845 GluA1 levels compared to the control (Figure  
401 3i), our data show a significant increase of basal pS831GluA1 in CRT-treated cells when compared to  
402 the control (Figure 3k). These observations are in line with our previous results showing enhanced  
403 GluA1 levels at the PSD, slowed down GluA1 cell surface trafficking, and increased spontaneous  
404 network activity upon PKD inhibition. As S831-phosphorylated GluA1 subunits are enriched at the  
405 PSD (Diering *et al.* 2016), it further suggests that the occurrence of GluA1-containing AMPARs at the  
406 PSD is enhanced in PKD-inhibited cells. Our data thus show that PKD activity coordinates the  
407 localization and endocytic trafficking of GluA1-containing AMPARs under basal conditions.

408

409

## 410 **PKD regulates activity-mediated AMPAR endocytosis**

411 Given that PKD activity promotes basal endocytotic AMPAR trafficking, we next investigated whether  
412 the kinase also plays a role in agonist-induced AMPAR endocytosis. To do so, we employed the  
413 biotinylation assay of receptor endocytosis using sulfo-NHS-SS-biotin (Ehlers 2000). Briefly,  
414 biotinylated hippocampal cultures were treated with CRT or DMSO, followed by 2 minutes of 100  $\mu$ M  
415 AMPA-evoked stimulation of AMPARs while simultaneously blocking NMDA receptors with 50  $\mu$ M  
416 D-AP5 (Figure 4a; treatment is designated as “AMPA”). Cells were incubated additionally for 10 min  
417 to allow for endocytosis before the remaining cell surface biotin was cleaved by a glutathione wash  
418 and cells were processed for analysis. In this way, GluA1 subunits remain biotinylated only within  
419 endosomes. In line with previous results, AMPA treatment enhanced GluA1 endocytosis as indicated  
420 by increased levels of internalized GluA1 in comparison to total GluA1, albeit not significantly (126%  
421  $\pm$  8% SEM compared to the control, Figure 4b, c). Strikingly, ligand-induced endocytosis of AMPARs  
422 was completely prevented when cells were pre-treated with CRT (72%  $\pm$  13% SEM compared to the  
423 control). Notably, AMPA treatment also enhanced autophosphorylation of PKD, indicating that the  
424 kinase is a downstream target of AMPAR signalling. The AMPA-induced increase in kinase activity  
425 was completely blocked by pre-treatment of cells with CRT (Figure 4d, e).

426 Treatment of hippocampal neuronal cultures with NMDA promotes activity-dependent endocytosis of  
427 AMPARs thereby evoking LTD (designated as cLTD) (Beattie *et al.* 2000; Collingridge *et al.* 2010;  
428 Lee *et al.* 1998; Lee *et al.* 2002; Lin & Huganir 2007). In order to investigate whether PKD activity is  
429 also required for GluA1 internalization evoked by cLTD treatment, cells were pre-treated with CRT or  
430 DMSO for 10 min followed by cLTD treatment for additional 5 min. Cells were then changed to an  
431 NMDA-free medium and incubated for 15 min to allow for receptor endocytosis before undergoing  
432 surface protein biotinylation using sulfo-NHS-SS-biotin (Figure 5a). After cell lysis, biotinylated  
433 proteins were precipitated and the total expression and surface levels of GluA1 were detected through  
434 Western Blot analysis (Figure 5b). Remarkably, cLTD treatment promoted a significant decrease in  
435 surface GluA1 (78%  $\pm$  1% SEM compared to the control) which could be prevented with CRT (124%  
436  $\pm$  10% SEM compared to the control, Figure 5c). Our data also show an enhanced PKD  
437 phosphorylation upon cLTD treatment indicating that PKD is activated downstream of NMDA  
438 receptors. In line with our previous data (Figure 1), CRT treatment completely prevented NMDA-  
439 induced PKD activation (Figure 5d, e). GluA1 dephosphorylation at S845 is a prerequisite for the LTD-  
440 induced endocytosis of AMPARs (Diering & Huganir 2018; Lee *et al.* 1998; Lee *et al.* 2003). In line  
441 with the literature, cLTD treatment promoted a significant decrease in the level of pS845 GluA1  
442 compared to the control. Notably, the NMDA-induced dephosphorylation of S845 was not blocked  
443 with CRT treatment (Figure 5f, g) suggesting that PKD acts further downstream.

444 MEA recordings were additionally taken and compared between control and cLTD treated cultures.  
445 Our prior experiments in patch clamp settings have already shown that firing output of such cultures  
446 are governed by potent depolarizing events when large numbers of neuron fire synchronously and drive  
447 the activity of postsynaptic cells via glutamatergic connections (network bursting)(Ratkai *et al.* 2021).  
448 In line with the reduced AMPA receptor levels upon cLTD treatment, network activity was  
449 significantly decreased, as indicated by elevated interspike interval medians (Figure 6a, b). In addition,  
450 bursts were completely diminished upon cLTD as also indicated by the extremely elevated ISI medians  
451 normalized to pre-cLTD values (Figure 6c). This latter observation indicates the reduction of potent  
452 depolarizing events, compound excitatory postsynaptic potentials that are the main contributors of  
453 action potential emissions of cultured neurons. Importantly, when CRT was present during NMDA  
454 treatment and for an additional 10 min, normalized interspike intervals were increased to a significantly  
455 lower extent compared to DMSO treated cultures (Figure 6c).

456 Collectively, our data demonstrate that PKD activity contributes to agonist- and activity-induced  
457 endocytosis of AMPARs and is required for a physiological change in network activity.

## 458 **Discussion**

459 In neurons, PKD regulates Golgi function and polarized secretory trafficking thereby contributing to  
460 dendrite development and the maintenance of neuronal polarity (Czondor *et al.* 2009; Quassollo *et al.*  
461 2015; Horton *et al.* 2005). Moreover, PKD activity is required for memory formation and learning  
462 (Bencsik *et al.* 2015). However, a role for PKD in the turnover of AMPARs has not been described  
463 yet. In the present study, we show that short-term inhibition of PKD activity increases the level of  
464 surface and synaptic GluA1-containing AMPARs under basal conditions and during chemically  
465 evoked AMPAR internalization. We further demonstrate that PKD is activated downstream of NMDA  
466 and AMPA receptor signaling and promotes AMPAR endocytosis.

467 The dynamic regulation of the number of synaptic AMPARs is one of the main mechanisms modifying  
468 long-term synaptic efficacy. Our data highlight PKD as a novel member of the postsynaptic signaling  
469 machinery regulating basal and activity-induced endocytosis of AMPARs. This is in line with our  
470 previous findings that PKD activity is required for the maintenance of the dendritic tree (Czondor *et al.*  
471 2009), as well as for the stabilization of the F-actin network within dendritic spines upon induction  
472 of LTP and learning and memory formation *in vivo* (Bencsik *et al.* 2015). Accordingly, a dual role for  
473 PKD in synaptic plasticity becomes apparent: on the one hand, the kinase controls the activity-induced  
474 potentiation and enlargement of spines during chemically-induced LTP through stabilization of the F-  
475 actin network within the newly enlarged dendritic spines (Bencsik *et al.* 2015), while on the other hand  
476 it is required for the elimination of AMPARs from the cell surface during cLTD.

477 In line with our results, PKD has been already described to participate in endocytosis and recycling of  
478 membrane proteins in non-neuronal cells. In fibroblasts, PKD activity is necessary for PDGF-driven  
479 short-loop recycling of  $\alpha_v\beta_3$  integrin (Woods *et al.* 2004). However, due to its established role in  
480 polarized secretory trafficking in neurons (Horton *et al.* 2005), inhibition of PKD activity is expected  
481 to affect exocytotic trafficking as well. Our FRAP data show that upon short-term PKD inhibition,  
482 GluA1-SEP signal recovered significantly slower, albeit to the same level as the control. This suggests  
483 that the mobile fraction of GluA1-SEP was unaltered, while PKD inhibition slows the trafficking of  
484 cell surface GluA1-SEP. In the absence of activity, recombinant GluA1-SEP is largely mobile on  
485 spines and the fast GluA1-SEP recovery mostly depends on lateral diffusion of plasma-membrane  
486 resident AMPARs from non-synaptic sites while exocytosis only has a small contribution (Makino &  
487 Malinow 2009). Therefore, based on our observation that caPKD expression significantly decreased  
488 the amount of GluA1 at the cell surface while increasing the amount of GluA1 in early endosomes and  
489 that the PKD inhibitor CRT prevented this, we hypothesize that PKD inhibition impairs the  
490 internalization of bleached GluA1-SEP, thereby slowing the rate at which non-synaptic, unbleached  
491 GluA1-SEP enters the postsynaptic membrane (Shi *et al.* 1999; Opazo & Choquet 2011; Opazo *et al.*  
492 2012; Lisman & Raghavachari 2006). However, we cannot fully exclude that short-term PKD  
493 inhibition might affect lateral mobility of AMPARs as well.

494 The small GTPase Rab5 regulates the fusion kinetics of plasma-derived endocytic vesicles with early  
495 endosomes in both basal and activity-mediated trafficking of AMPARs (Bucci *et al.* 1992; Gorvel *et al.*  
496 1991; Sziber *et al.* 2017) and is essential for LTD (Brown *et al.* 2005). In accordance, loss or  
497 inhibition of the Rab5 effector protein EEA1 results in increased GluA1-containing AMPAR surface  
498 expression (Selak *et al.* 2006; Xu & Pozzo-Miller 2017) reminiscent of the increased GluA1 surface  
499 expression observed upon short-term PKD inhibition. Additionally, expression of constitutive active

500 PKD enhanced the co-localization of GluA1 with EEA1, supporting a role for PKD in promoting  
501 AMPAR endocytosis through regulating Rab5 activity. To date, two PKD substrates, RIN1 and  
502 Rabaptin-5, are known to be involved in the endocytosis of surface receptors. RIN1 is a Rab5 guanosine  
503 exchange factor (GEF) and we recently showed that its ability to enhance Rab5 activity is a critical  
504 step during activity-dependent AMPAR internalization (Sziber *et al.* 2017). PKD-mediated  
505 phosphorylation of RIN1 modulates its ability to activate Abl kinases (Ziegler *et al.* 2011), however,  
506 an effect on Rab5 activation and AMPAR endocytosis has not been investigated yet. Rabaptin-5 forms  
507 a complex with Rabex-5, a Rab5-GEF, and Rab5, thereby promoting Rab5 activation during  
508 endocytosis (Horiuchi *et al.* 1997; Zhang *et al.* 2014). Notably, PKD-mediated Rabaptin-5  
509 phosphorylation is implicated in the regulation of integrin receptor trafficking in cancer cells  
510 (Christoforides *et al.* 2012). It is therefore intriguing to speculate that signaling from PKD to RIN1  
511 and/or Rabaptin-5 may promote activation of Rab5 and thus AMPAR endocytosis.

512 The presence and regulation of post-translational modifications on neurotransmitter receptors modifies  
513 their function and trafficking and thus synaptic strength. Post-translational modifications have been  
514 described to mediate numerous processes including AMPAR membrane targeting, retention,  
515 conductance, endocytosis and degradation (Boehm *et al.* 2006; Chung *et al.* 2000; Coultrap *et al.* 2014;  
516 Esteban *et al.* 2003; Hayashi & Huganir 2004; Lee *et al.* 2010; Roche *et al.* 1996; Seidenman *et al.*  
517 2003; Steinberg *et al.* 2006; Widagdo *et al.* 2015). Several phosphorylation sites on GluA1 have  
518 already been shown to be important for stability at the PSD and AMPAR conductance (Boehm *et al.*  
519 2006; Derkach *et al.* 1999; Esteban 2003; Roche *et al.* 1996), with S831 and S845 being best  
520 understood. CaMKII/PKC-mediated phosphorylation of S831 increases single-channel conductance  
521 (Barria *et al.* 1997; Derkach *et al.* 1999). Moreover, under basal conditions, pS831-GluA1 receptors  
522 are enriched at the PSD suggesting that phosphorylation at S831 increases GluA1 targeting to this  
523 compartment (Diering *et al.* 2016). In agreement with this, we detected an increase in pS831 GluA1  
524 levels upon short-term PKD inhibition, presumably as a consequence of impaired AMPAR  
525 endocytosis. PKA-mediated phosphorylation of S845 has been described to promote GluA1 targeting  
526 to the cell surface and single-channel open probability (Banke *et al.* 2000; Lee *et al.* 2010; Man *et al.*  
527 2007). Notably, dephosphorylation at S845 is required for AMPAR endocytosis upon LTD (Lee *et al.*  
528 2010). Our data show that acute CRT treatment did not prevent the dephosphorylation of GluA1 at  
529 serine 845 in response to cLTD. This suggests that i) PKD activity promotes AMPAR endocytosis  
530 downstream of S845 dephosphorylation and ii) upon PKD inhibition, AMPARs are primed for their  
531 endocytosis but remain on the surface.

532 Based on our data we propose the following model on how PKD regulates AMPAR endocytic  
533 trafficking: under basal conditions, endogenous PKD is active and promotes the removal of AMPARs  
534 from the synaptic membrane by Rab5-dependent endocytosis. Chemically-induced AMPAR  
535 endocytosis either through NMDA receptor or AMPAR stimulation further enhances PKD activity thus  
536 accelerating AMPAR elimination from the surface.

537 As most excitatory transmission in the brain is mediated by the AMPARs, their dysfunction has been  
538 observed in many neuronal disorders, with Alzheimer disease (AD) being the best reported so far. High  
539 concentration of soluble oligomeric A $\beta$  induces the removal of surface AMPARs at synapses, leading  
540 to synaptic depression and impaired synaptic plasticity and memory (Hsieh *et al.* 2006; Shankar *et al.*  
541 2007). Strikingly, at preclinical stages of AD, the appearance of enlarged Rab5-positive early  
542 endosomes was associated with Rabaptin-5 translocation to endosomes (Cataldo *et al.* 2000). Indeed,  
543 hyperactivation of Rab5 has been observed in AD patients and mouse models of AD disease (Ginsberg  
544 *et al.* 2010a; Ginsberg *et al.* 2011; Ginsberg *et al.* 2010b). These data imply that endocytic uptake of

545 AMPARs is enhanced in AD, however, whether this also correlates with increased PKD activity needs  
546 to be addressed in future studies.

547

## 548 **Acknowledgements**

549 We are grateful to Viktória Szentgyörgyi and Gisela Link (Institute for Cell Biology and Immunology,  
550 Germany) for their excellent technical assistance and Raluca Tamas (Institute for Cell Biology and  
551 Immunology, Germany) for critical reading of the manuscript. The manuscript has been deposited as  
552 a preprint in bioRxiv (doi: <https://doi.org/10.1101/2020.04.09.033514>).

553

## 554 **Conflicts of interest**

555 The authors declare that the research was conducted in the absence of any commercial or financial  
556 relationships that could be construed as a potential conflict of interest.

557

## 558 **Authors' contributions**

559 **Conceptualization:** Angelika Hausser, Katalin Schlett; **Methodology:** Carlos O. Oueslati Morales,  
560 Attila Ignacz, Norbert Bencsik, Aniko E. Ratkai, Wolfgang S. Lieb; **Formal analysis and**  
561 **investigation:** Carlos O. Oueslati Morales, Attila Ignacz, Attila Szücs, Aniko E. Ratkai, Norbert  
562 Bencsik, Stephan A. Eisler, Wolfgang S. Lieb; **Writing - original draft preparation:** Carlos O.  
563 Oueslati Morales; **Writing - review and editing:** Angelika Hausser, Katalin Schlett; **Funding**  
564 **acquisition:** Angelika Hausser, Katalin Schlett. All authors contributed to the article and approved the  
565 submitted version.

566

## 567 **Funding**

568 This study was funded by a grant from the German Research Foundation to AH (DFG HA-357/11-2),  
569 a travel exchange program funded by the DAAD (PPP Hungary 57215775 and 57392635), and by the  
570 National Brain Research Programs (KTIA\_NAP\_13-2-2014-0018 and 2017-1.2.1-NKP-2017-00002)  
571 to KS as well as the VEKOP-2.3.3-15-2016-00007 grant from NRDIO.

572

## 573 **Bibliography**

574 Banke, T. G., Bowie, D., Lee, H., Huganir, R. L., Schousboe, A. and Traynelis, S. F. (2000) Control  
575 of GluR1 AMPA receptor function by cAMP-dependent protein kinase. *The Journal of*  
576 *neuroscience : the official journal of the Society for Neuroscience* **20**, 89-102.

577 Barria, A., Derkach, V. and Soderling, T. (1997) Identification of the Ca<sup>2+</sup>/calmodulin-dependent  
578 protein kinase II regulatory phosphorylation site in the alpha-amino-3-hydroxyl-5-methyl-4-  
579 isoxazole-propionate-type glutamate receptor. *The Journal of biological chemistry* **272**, 32727-  
580 32730.

- 581 Beattie, E. C., Carroll, R. C., Yu, X., Morishita, W., Yasuda, H., von Zastrow, M. and Malenka, R. C.  
582 (2000) Regulation of AMPA receptor endocytosis by a signaling mechanism shared with LTD.  
583 *Nature neuroscience* **3**, 1291-1300.
- 584 Bencsik, N., Sziber, Z., Liliom, H. et al. (2015) Protein kinase D promotes plasticity-induced F-actin  
585 stabilization in dendritic spines and regulates memory formation. *The Journal of cell biology*  
586 **210**, 771-783.
- 587 Bisbal, M., Conde, C., Donoso, M. et al. (2008) Protein kinase d regulates trafficking of dendritic  
588 membrane proteins in developing neurons. *The Journal of neuroscience : the official journal*  
589 *of the Society for Neuroscience* **28**, 9297-9308.
- 590 Blanpied, T. A., Scott, D. B. and Ehlers, M. D. (2002) Dynamics and regulation of clathrin coats at  
591 specialized endocytic zones of dendrites and spines. *Neuron* **36**, 435-449.
- 592 Boehm, J., Kang, M. G., Johnson, R. C., Esteban, J., Hugarir, R. L. and Malinow, R. (2006) Synaptic  
593 incorporation of AMPA receptors during LTP is controlled by a PKC phosphorylation site on  
594 GluR1. *Neuron* **51**, 213-225.
- 595 Borges, S., Perez, E. A., Thompson, E. A., Radisky, D. C., Geiger, X. J. and Storz, P. (2015) Effective  
596 Targeting of Estrogen Receptor-Negative Breast Cancers with the Protein Kinase D Inhibitor  
597 CRT0066101. *Molecular cancer therapeutics* **14**, 1306-1316.
- 598 Brown, T. C., Tran, I. C., Backos, D. S. and Esteban, J. A. (2005) NMDA receptor-dependent activation  
599 of the small GTPase Rab5 drives the removal of synaptic AMPA receptors during hippocampal  
600 LTD. *Neuron* **45**, 81-94.
- 601 Bucci, C., Parton, R. G., Mather, I. H., Stunnenberg, H., Simons, K., Hoflack, B. and Zerial, M. (1992)  
602 The small GTPase rab5 functions as a regulatory factor in the early endocytic pathway. *Cell*  
603 **70**, 715-728.
- 604 Carroll, R. C., Lissin, D. V., von Zastrow, M., Nicoll, R. A. and Malenka, R. C. (1999) Rapid  
605 redistribution of glutamate receptors contributes to long-term depression in hippocampal  
606 cultures. *Nature neuroscience* **2**, 454-460.
- 607 Cataldo, A. M., Peterhoff, C. M., Troncoso, J. C., Gomez-Isla, T., Hyman, B. T. and Nixon, R. A.  
608 (2000) Endocytic pathway abnormalities precede amyloid beta deposition in sporadic  
609 Alzheimer's disease and Down syndrome: differential effects of APOE genotype and presenilin  
610 mutations. *The American journal of pathology* **157**, 277-286.
- 611 Chater, T. E. and Goda, Y. (2014) The role of AMPA receptors in postsynaptic mechanisms of synaptic  
612 plasticity. *Front Cell Neurosci* **8**, 401.
- 613 Christoforides, C., Rainero, E., Brown, K. K., Norman, J. C. and Toker, A. (2012) PKD controls  
614 alphavbeta3 integrin recycling and tumor cell invasive migration through its substrate  
615 Rabaptin-5. *Developmental cell* **23**, 560-572.
- 616 Chung, H. J., Xia, J., Scannevin, R. H., Zhang, X. and Hugarir, R. L. (2000) Phosphorylation of the  
617 AMPA receptor subunit GluR2 differentially regulates its interaction with PDZ domain-  
618 containing proteins. *The Journal of neuroscience : the official journal of the Society for*  
619 *Neuroscience* **20**, 7258-7267.
- 620 Collingridge, G. L., Peineau, S., Howland, J. G. and Wang, Y. T. (2010) Long-term depression in the  
621 CNS. *Nature reviews. Neuroscience* **11**, 459-473.

- 622 Coultrap, S. J., Freund, R. K., O'Leary, H., Sanderson, J. L., Roche, K. W., Dell'Acqua, M. L. and  
623 Bayer, K. U. (2014) Autonomous CaMKII mediates both LTP and LTD using a mechanism for  
624 differential substrate site selection. *Cell reports* **6**, 431-437.
- 625 Czondor, K., Ellwanger, K., Fuchs, Y. F., Lutz, S., Gulyas, M., Mansuy, I. M., Hausser, A.,  
626 Pfizenmaier, K. and Schlett, K. (2009) Protein kinase D controls the integrity of Golgi apparatus  
627 and the maintenance of dendritic arborization in hippocampal neurons. *Molecular biology of*  
628 *the cell* **20**, 2108-2120.
- 629 Derkach, V., Barria, A. and Soderling, T. R. (1999) Ca<sup>2+</sup>/calmodulin-kinase II enhances channel  
630 conductance of alpha-amino-3-hydroxy-5-methyl-4-isoxazolepropionate type glutamate  
631 receptors. *Proceedings of the National Academy of Sciences of the United States of America*  
632 **96**, 3269-3274.
- 633 Diering, G. H., Heo, S., Hussain, N. K., Liu, B. and Huganir, R. L. (2016) Extensive phosphorylation  
634 of AMPA receptors in neurons. *Proceedings of the National Academy of Sciences of the United*  
635 *States of America* **113**, E4920-4927.
- 636 Diering, G. H. and Huganir, R. L. (2018) The AMPA Receptor Code of Synaptic Plasticity. *Neuron*  
637 **100**, 314-329.
- 638 Ehlers, M. D. (2000) Reinsertion or degradation of AMPA receptors determined by activity-dependent  
639 endocytic sorting. *Neuron* **28**, 511-525.
- 640 Ellwanger, K. and Hausser, A. (2013) Physiological functions of protein kinase D in vivo. *IUBMB life*  
641 **65**, 98-107.
- 642 Esteban, J. A. (2003) AMPA receptor trafficking: a road map for synaptic plasticity. *Molecular*  
643 *interventions* **3**, 375-385.
- 644 Esteban, J. A., Shi, S. H., Wilson, C., Nuriya, M., Huganir, R. L. and Malinow, R. (2003) PKA  
645 phosphorylation of AMPA receptor subunits controls synaptic trafficking underlying plasticity.  
646 *Nature neuroscience* **6**, 136-143.
- 647 Ginsberg, S. D., Alldred, M. J., Counts, S. E. et al. (2010a) Microarray analysis of hippocampal CA1  
648 neurons implicates early endosomal dysfunction during Alzheimer's disease progression.  
649 *Biological psychiatry* **68**, 885-893.
- 650 Ginsberg, S. D., Mufson, E. J., Alldred, M. J., Counts, S. E., Wu, J., Nixon, R. A. and Che, S. (2011)  
651 Upregulation of select rab GTPases in cholinergic basal forebrain neurons in mild cognitive  
652 impairment and Alzheimer's disease. *Journal of chemical neuroanatomy* **42**, 102-110.
- 653 Ginsberg, S. D., Mufson, E. J., Counts, S. E., Wu, J., Alldred, M. J., Nixon, R. A. and Che, S. (2010b)  
654 Regional selectivity of rab5 and rab7 protein upregulation in mild cognitive impairment and  
655 Alzheimer's disease. *Journal of Alzheimer's disease : JAD* **22**, 631-639.
- 656 Gorvel, J. P., Chavrier, P., Zerial, M. and Gruenberg, J. (1991) rab5 controls early endosome fusion in  
657 vitro. *Cell* **64**, 915-925.
- 658 Greger, I. H., Khatri, L. and Ziff, E. B. (2002) RNA editing at arg607 controls AMPA receptor exit  
659 from the endoplasmic reticulum. *Neuron* **34**, 759-772.
- 660 Harikumar, K. B., Kunnumakkara, A. B., Ochi, N. et al. (2010) A novel small-molecule inhibitor of  
661 protein kinase D blocks pancreatic cancer growth in vitro and in vivo. *Molecular cancer*  
662 *therapeutics* **9**, 1136-1146.



- 663 Hausser, A., Link, G., Bamberg, L., Burzlaff, A., Lutz, S., Pfizenmaier, K. and Johannes, F. J. (2002)  
664 Structural requirements for localization and activation of protein kinase C mu (PKC mu) at the  
665 Golgi compartment. *The Journal of cell biology* **156**, 65-74.
- 666 Hayashi, T. and Huganir, R. L. (2004) Tyrosine phosphorylation and regulation of the AMPA receptor  
667 by SRC family tyrosine kinases. *The Journal of neuroscience : the official journal of the Society*  
668 *for Neuroscience* **24**, 6152-6160.
- 669 Hayashi, Y., Shi, S. H., Esteban, J. A., Piccini, A., Poncer, J. C. and Malinow, R. (2000) Driving  
670 AMPA receptors into synapses by LTP and CaMKII: requirement for GluR1 and PDZ domain  
671 interaction. *Science* **287**, 2262-2267.
- 672 Henley, J. M. and Wilkinson, K. A. (2013) AMPA receptor trafficking and the mechanisms underlying  
673 synaptic plasticity and cognitive aging. *Dialogues in clinical neuroscience* **15**, 11-27.
- 674 Horiuchi, H., Lippe, R., McBride, H. M. et al. (1997) A novel Rab5 GDP/GTP exchange factor  
675 complexed to Rabaptin-5 links nucleotide exchange to effector recruitment and function. *Cell*  
676 **90**, 1149-1159.
- 677 Horton, A. C., Racz, B., Monson, E. E., Lin, A. L., Weinberg, R. J. and Ehlers, M. D. (2005) Polarized  
678 secretory trafficking directs cargo for asymmetric dendrite growth and morphogenesis. *Neuron*  
679 **48**, 757-771.
- 680 Hsieh, H., Boehm, J., Sato, C., Iwatsubo, T., Tomita, T., Sisodia, S. and Malinow, R. (2006) AMPAR  
681 removal underlies Abeta-induced synaptic depression and dendritic spine loss. *Neuron* **52**, 831-  
682 843.
- 683 Huganir, R. L. and Nicoll, R. A. (2013) AMPARs and synaptic plasticity: the last 25 years. *Neuron* **80**,  
684 704-717.
- 685 Kopec, C. D., Li, B., Wei, W., Boehm, J. and Malinow, R. (2006) Glutamate receptor exocytosis and  
686 spine enlargement during chemically induced long-term potentiation. *The Journal of*  
687 *neuroscience : the official journal of the Society for Neuroscience* **26**, 2000-2009.
- 688 Lee, H. K., Kameyama, K., Huganir, R. L. and Bear, M. F. (1998) NMDA induces long-term synaptic  
689 depression and dephosphorylation of the GluR1 subunit of AMPA receptors in hippocampus.  
690 *Neuron* **21**, 1151-1162.
- 691 Lee, H. K., Takamiya, K., Han, J. S. et al. (2003) Phosphorylation of the AMPA receptor GluR1 subunit  
692 is required for synaptic plasticity and retention of spatial memory. *Cell* **112**, 631-643.
- 693 Lee, H. K., Takamiya, K., He, K., Song, L. and Huganir, R. L. (2010) Specific roles of AMPA receptor  
694 subunit GluR1 (GluA1) phosphorylation sites in regulating synaptic plasticity in the CA1  
695 region of hippocampus. *Journal of neurophysiology* **103**, 479-489.
- 696 Lee, S. H., Liu, L., Wang, Y. T. and Sheng, M. (2002) Clathrin adaptor AP2 and NSF interact with  
697 overlapping sites of GluR2 and play distinct roles in AMPA receptor trafficking and  
698 hippocampal LTD. *Neuron* **36**, 661-674.
- 699 Lieb, W. S., Lungu, C., Tamas, R., Berreth, H., Rathert, P., Storz, P., Olayioye, M. A. and Hausser, A.  
700 (2020) The GEF-H1/PKD3 signaling pathway promotes the maintenance of triple-negative  
701 breast cancer stem cells. *International journal of cancer* **146**, 3423-3434.
- 702 Lin, D. T. and Huganir, R. L. (2007) PICK1 and phosphorylation of the glutamate receptor 2 (GluR2)  
703 AMPA receptor subunit regulates GluR2 recycling after NMDA receptor-induced  
704 internalization. *The Journal of neuroscience : the official journal of the Society for*  
705 *Neuroscience* **27**, 13903-13908.

- 706 Lisman, J. and Raghavachari, S. (2006) A unified model of the presynaptic and postsynaptic changes  
707 during LTP at CA1 synapses. *Science's STKE : signal transduction knowledge environment*  
708 **2006**, re11.
- 709 Lu, W., Shi, Y., Jackson, A. C., Bjorgan, K., Doring, M. J., Sprengel, R., Seeburg, P. H. and Nicoll, R.  
710 A. (2009) Subunit composition of synaptic AMPA receptors revealed by a single-cell genetic  
711 approach. *Neuron* **62**, 254-268.
- 712 Luscher, C., Xia, H., Beattie, E. C., Carroll, R. C., von Zastrow, M., Malenka, R. C. and Nicoll, R. A.  
713 (1999) Role of AMPA receptor cycling in synaptic transmission and plasticity. *Neuron* **24**, 649-  
714 658.
- 715 Makino, H. and Malinow, R. (2009) AMPA receptor incorporation into synapses during LTP: the role  
716 of lateral movement and exocytosis. *Neuron* **64**, 381-390.
- 717 Malinow, R. and Malenka, R. C. (2002) AMPA receptor trafficking and synaptic plasticity. *Annual*  
718 *review of neuroscience* **25**, 103-126.
- 719 Man, H. Y., Lin, J. W., Ju, W. H., Ahmadian, G., Liu, L., Becker, L. E., Sheng, M. and Wang, Y. T.  
720 (2000) Regulation of AMPA receptor-mediated synaptic transmission by clathrin-dependent  
721 receptor internalization. *Neuron* **25**, 649-662.
- 722 Man, H. Y., Sekine-Aizawa, Y. and Huganir, R. L. (2007) Regulation of {alpha}-amino-3-hydroxy-5-  
723 methyl-4-isoxazolepropionic acid receptor trafficking through PKA phosphorylation of the Glu  
724 receptor 1 subunit. *Proceedings of the National Academy of Sciences of the United States of*  
725 *America* **104**, 3579-3584.
- 726 Matthews, S. A., Rozengurt, E. and Cantrell, D. (1999) Characterization of serine 916 as an in vivo  
727 autophosphorylation site for protein kinase D/Protein kinase Cmu. *The Journal of biological*  
728 *chemistry* **274**, 26543-26549.
- 729 Mu, F. T., Callaghan, J. M., Steele-Mortimer, O. et al. (1995) EEA1, an early endosome-associated  
730 protein. EEA1 is a conserved alpha-helical peripheral membrane protein flanked by cysteine  
731 "fingers" and contains a calmodulin-binding IQ motif. *The Journal of biological chemistry* **270**,  
732 13503-13511.
- 733 Naisbitt, S., Kim, E., Tu, J. C., Xiao, B., Sala, C., Valtschanoff, J., Weinberg, R. J., Worley, P. F. and  
734 Sheng, M. (1999) Shank, a novel family of postsynaptic density proteins that binds to the  
735 NMDA receptor/PSD-95/GKAP complex and cortactin. *Neuron* **23**, 569-582.
- 736 Olayioye, M. A., Barisic, S. and Hausser, A. (2013) Multi-level control of actin dynamics by protein  
737 kinase D. *Cellular signalling* **25**, 1739-1747.
- 738 Opazo, P. and Choquet, D. (2011) A three-step model for the synaptic recruitment of AMPA receptors.  
739 *Molecular and cellular neurosciences* **46**, 1-8.
- 740 Opazo, P., Sainlos, M. and Choquet, D. (2012) Regulation of AMPA receptor surface diffusion by  
741 PSD-95 slots. *Current opinion in neurobiology* **22**, 453-460.
- 742 Oster, H., Abraham, D. and Leitges, M. (2006) Expression of the protein kinase D (PKD) family during  
743 mouse embryogenesis. *Gene expression patterns : GEP* **6**, 400-408.
- 744 Passafaro, M., Piech, V. and Sheng, M. (2001) Subunit-specific temporal and spatial patterns of AMPA  
745 receptor exocytosis in hippocampal neurons. *Nature neuroscience* **4**, 917-926.
- 746 Pick, J. E. and Ziff, E. B. (2018) Regulation of AMPA receptor trafficking and exit from the  
747 endoplasmic reticulum. *Molecular and cellular neurosciences* **91**, 3-9.

- 748 Quassollo, G., Wojnacki, J., Salas, D. A., Gastaldi, L., Marzolo, M. P., Conde, C., Bisbal, M., Couve,  
749 A. and Caceres, A. (2015) A RhoA Signaling Pathway Regulates Dendritic Golgi Outpost  
750 Formation. *Current biology : CB* **25**, 971-982.
- 751 Ratkai, A., Tarnok, K., Aouad, H. E., Micska, B., Schlett, K. and Szucs, A. (2021) Homeostatic  
752 plasticity and burst activity are mediated by hyperpolarization-activated cation currents and T-  
753 type calcium channels in neuronal cultures. *Scientific reports* **11**, 3236.
- 754 Reinhardt, R., Truebestein, L., Schmidt, H. A. and Leonard, T. A. (2020) It Takes Two to Tango:  
755 Activation of Protein Kinase D by Dimerization. *BioEssays : news and reviews in molecular,  
756 cellular and developmental biology* **42**, e1900222.
- 757 Roche, K. W., O'Brien, R. J., Mammen, A. L., Bernhardt, J. and Huganir, R. L. (1996) Characterization  
758 of multiple phosphorylation sites on the AMPA receptor GluR1 subunit. *Neuron* **16**, 1179-  
759 1188.
- 760 Rosendale, M., Jullie, D., Choquet, D. and Perrais, D. (2017) Spatial and Temporal Regulation of  
761 Receptor Endocytosis in Neuronal Dendrites Revealed by Imaging of Single Vesicle  
762 Formation. *Cell reports* **18**, 1840-1847.
- 763 Seidenman, K. J., Steinberg, J. P., Huganir, R. and Malinow, R. (2003) Glutamate receptor subunit 2  
764 Serine 880 phosphorylation modulates synaptic transmission and mediates plasticity in CA1  
765 pyramidal cells. *The Journal of neuroscience : the official journal of the Society for  
766 Neuroscience* **23**, 9220-9228.
- 767 Selak, S., Paternain, A. V., Fritzler, M. J. and Lerma, J. (2006) Human autoantibodies against early  
768 endosome antigen-1 enhance excitatory synaptic transmission. *Neuroscience* **143**, 953-964.
- 769 Selak, S., Woodman, R. C. and Fritzler, M. J. (2000) Autoantibodies to early endosome antigen (EEA1)  
770 produce a staining pattern resembling cytoplasmic anti-neutrophil cytoplasmic antibodies (C-  
771 ANCA). *Clinical and experimental immunology* **122**, 493-498.
- 772 Shankar, G. M., Bloodgood, B. L., Townsend, M., Walsh, D. M., Selkoe, D. J. and Sabatini, B. L.  
773 (2007) Natural oligomers of the Alzheimer amyloid-beta protein induce reversible synapse loss  
774 by modulating an NMDA-type glutamate receptor-dependent signaling pathway. *The Journal  
775 of neuroscience : the official journal of the Society for Neuroscience* **27**, 2866-2875.
- 776 Shi, S., Hayashi, Y., Esteban, J. A. and Malinow, R. (2001) Subunit-specific rules governing AMPA  
777 receptor trafficking to synapses in hippocampal pyramidal neurons. *Cell* **105**, 331-343.
- 778 Shi, S. H., Hayashi, Y., Petralia, R. S., Zaman, S. H., Wenthold, R. J., Svoboda, K. and Malinow, R.  
779 (1999) Rapid spine delivery and redistribution of AMPA receptors after synaptic NMDA  
780 receptor activation. *Science* **284**, 1811-1816.
- 781 Steinberg, J. P., Takamiya, K., Shen, Y. et al. (2006) Targeted in vivo mutations of the AMPA receptor  
782 subunit GluR2 and its interacting protein PICK1 eliminate cerebellar long-term depression.  
783 *Neuron* **49**, 845-860.
- 784 Sziber, Z., Liliom, H., Morales, C. O. et al. (2017) Ras and Rab interactor 1 controls neuronal plasticity  
785 by coordinating dendritic filopodial motility and AMPA receptor turnover. *Molecular biology  
786 of the cell* **28**, 285-295.
- 787 van der Sluijs, P. and Hoogenraad, C. C. (2011) New insights in endosomal dynamics and AMPA  
788 receptor trafficking. *Seminars in cell & developmental biology* **22**, 499-505.

- 789 Widagdo, J., Chai, Y. J., Ridder, M. C., Chau, Y. Q., Johnson, R. C., Sah, P., Huganir, R. L. and  
790 Anggono, V. (2015) Activity-Dependent Ubiquitination of GluA1 and GluA2 Regulates  
791 AMPA Receptor Intracellular Sorting and Degradation. *Cell reports* **10**, 783-795.
- 792 Woods, A. J., White, D. P., Caswell, P. T. and Norman, J. C. (2004) PKD1/PKCmu promotes  
793 alphavbeta3 integrin recycling and delivery to nascent focal adhesions. *The EMBO journal* **23**,  
794 2531-2543.
- 795 Xu, X. and Pozzo-Miller, L. (2017) EEA1 restores homeostatic synaptic plasticity in hippocampal  
796 neurons from Rett syndrome mice. *The Journal of physiology* **595**, 5699-5712.
- 797 Yin, D. M., Huang, Y. H., Zhu, Y. B. and Wang, Y. (2008) Both the establishment and maintenance  
798 of neuronal polarity require the activity of protein kinase D in the Golgi apparatus. *The Journal*  
799 *of neuroscience : the official journal of the Society for Neuroscience* **28**, 8832-8843.
- 800 Zhang, Z., Meszaros, G., He, W. T. et al. (2017) Protein kinase D at the Golgi controls NLRP3  
801 inflammasome activation. *The Journal of experimental medicine* **214**, 2671-2693.
- 802 Zhang, Z., Zhang, T., Wang, S., Gong, Z., Tang, C., Chen, J. and Ding, J. (2014) Molecular mechanism  
803 for Rabex-5 GEF activation by Rabaptin-5. *eLife* **3**.
- 804 Zhu, J. J., Esteban, J. A., Hayashi, Y. and Malinow, R. (2000) Postnatal synaptic potentiation: delivery  
805 of GluR4-containing AMPA receptors by spontaneous activity. *Nature neuroscience* **3**, 1098-  
806 1106.
- 807 Ziegler, S., Eiseler, T., Scholz, R. P., Beck, A., Link, G. and Hausser, A. (2011) A novel protein kinase  
808 D phosphorylation site in the tumor suppressor Rab interactor 1 is critical for coordination of  
809 cell migration. *Molecular biology of the cell* **22**, 570-580.

810

## 811 **Figure legends**

### 812 **Fig. 1 PKD regulates basal AMPAR trafficking**

813 Representative Western Blots obtained from hippocampal neuronal cultures treated with DMSO (-) or  
814 CRT displaying PKD and pS916PKD levels (a) and total and surface GluA1 levels upon biotinylation  
815 (c). Actin served as a loading control and is absent from the precipitated samples. (b and d)  
816 Quantification of data shown in (a) and (c), respectively, using densitometry analysis. Data from CRT-  
817 treated cultures are presented as mean line density  $\pm$  SEM normalized to the control cultures; each dot  
818 represents one independent culture. Statistical comparison was performed by unpaired two-tailed t-  
819 test. The dotted line indicates the control level. (e and g) Representative inverted single-channel and  
820 colored merged pictures of neuronal dendritic branches treated with DMSO or CRT (e) or expressing  
821 EGFP or caPKD-EGFP (g) stained for the extracellular N-terminal domain of GluA1 and the PSD  
822 marker Shank2. Arrows point to Shank2-positive areas included in the analysis. The EGFP signal is  
823 not included in the colored merged image. (f and h) Quantification of pictures shown in (e) and (g),  
824 respectively. Data were normalized for the DMSO (f) or EGFP control (h). The boxplots show the  
825 results of three independent cultures with 11 (DMSO), 12 (CRT), 17 (EGFP) and 12 (caPKD) neurons  
826 analyzed. Center lines show the medians; box limits indicate the 25th and 75th percentiles; whiskers  
827 extend 1.5 times the interquartile range from the 25th and 75th percentiles, outliers are represented by  
828 dots. The number of investigated sample points (Shank2+ areas) is n=171 and 273 (f) or n=220 and  
829 223 (h), respectively. The significance of differences was analyzed by a Mann-Whitney test (two-  
830 tailed).

831 **Fig. 2 PKD regulates spontaneous neuronal network activity**

832 (a) Representative phase contrast images of a MEA plate well at 13 days in vitro (DIV13) age. Scale  
833 bar 1  $\mu\text{m}$  (left), 100  $\mu\text{m}$  (right). (b) Short segments of raw voltage traces before and after CRT  
834 treatment. (c, e) Raw MEA data: Quantification of the raw interspike interval median (c) and the raw  
835 burstiness median (e) of neuronal cultures both before and after treatment with DMSO or CRT for 10  
836 min. (d and f) Quantification of data shown in (b). The interspike interval median (d) and the burstiness  
837 median (f) were normalized for the DMSO controls. The boxplots show the results of three independent  
838 cultures. Center lines show the medians; box limits indicate the 25th and 75th percentiles; whiskers  
839 extend 1.5 times the interquartile range from the 25th and 75th percentiles, outliers are represented by  
840 dots. The significance of differences was analyzed by a Mann-Whitney test (two-tailed) (d, f) or a  
841 Wilcoxon matched-pairs signed rank test (two-tailed) (c, e). \* $p < 0.05$ , \*\* $p < 0.01$ , \*\*\* $p < 0.001$ ,  
842 \*\*\*\* $p < 0.0001$ .

843 **Fig. 3 PKD specifically controls AMPAR endocytosis**

844 (a) Representative pictures of neuronal dendritic spines expressing Super Ecliptic pHluorin-tagged  
845 GluA1 (GluA1-SEP) and mRuby2. Cells were treated with DMSO as a control or CRT prior to the  
846 bleaching event. Images show dendritic spines before bleaching, as well as 5, 60 and 600s afterwards.  
847 (b) Fluorescence recovery curve and (c) one-phase association curve fitting of the GluA1-SEP intensity  
848 after bleaching. Data shown as mean  $\pm$  SEM (b) or with 95% CI (c) from 3-4 independent experiments;  
849  $n = 14$  and 27 analyzed dendritic spines from 12 and 16 neurons, for DMSO and CRT-treated  
850 conditions, respectively. The significance of differences was analyzed by a multiple t-test, using the  
851 Holm-Sidak method. (d) Recovery half-time of the GluA1-SEP signal and (e) mobile GluA1 fraction.  
852 Data shown as mean  $\pm$  95% CI. (f) Representative inverted single-channel and colored merge pictures  
853 of neuronal dendritic branches expressing EGFP or caPKD-EGFP. Cells were treated with DMSO (-)  
854 or CRT, fixed and stained for the early endosome marker EEA1 and for GluA1. Arrows point to the  
855 EEA1-positive early endosomes included in the analysis. The EGFP signal is not included in the  
856 colored merged image. (g) Manders' overlap coefficient for EEA1 and GluA1. Quantification of  
857 pictures shown in (f). The boxplot shows the results of three independent cultures. Center lines show  
858 the medians; box limits indicate the 25th and 75th percentiles; whiskers extend 1.5 times the  
859 interquartile range from the 25th and 75th percentiles, outliers are represented by dots;  $n = 28$  cells  
860 each. The significance of differences was analyzed by a Kruskal-Wallis test with Dunn's multiple  
861 correction. Representative Western Blot displaying total and pS845 GluA1 (h) as well as total and  
862 pS831 GluA1 (j) levels of DMSO (-) or CRT-treated hippocampal neuronal cultures. Actin served as  
863 a loading control. (i and k) Quantification of data shown in (h) and (j), respectively, using densitometry  
864 analysis. Data are presented as mean line density  $\pm$  SEM of CRT normalized to the control (-), each  
865 dot represents one independent experiment ( $n = 3$ ). Statistical comparison by unpaired two-tailed t-test.  
866 The dotted line indicates the control level. \* $p < 0.05$ , \*\* $p < 0.01$ . Scale bar 2  $\mu\text{m}$

867 **Fig. 4 PKD activity is required for agonist-induced AMPAR endocytosis**

868 (a) Scheme displaying the surface biotinylation assay for receptor internalization. After surface  
869 biotinylation, cells were treated with DMSO or CRT followed by AMPA and D-AP5 application.  
870 Afterwards, cultures were treated with glutathione to remove remaining surface biotin. Thereby,  
871 biotinylated GluA1 signal is detected only in endocytosed AMPARs, evoked by combined AMPA and  
872 D-AP5 treatment. Representative Western Blots displaying (b) total and internalized GluA1 levels and  
873 (d) PKD and pS916PKD levels in hippocampal neuronal cultures. Actin served as a loading control  
874 and is absent from the precipitated samples. (c, e) Quantification of data shown in (b, d), using

875 densitometry analysis. Data are presented as mean line density  $\pm$  SEM of the treated samples (AMPA  
876 and CRT plus AMPA) normalized to the control, each dot represents one independent culture.  
877 Statistical comparison was done by one-way ANOVA with Sidak's correction. The dotted lines  
878 represent the control level.

#### 879 **Fig. 5 PKD activity is required for cLTD-induced AMPAR endocytosis**

880 (a) Scheme displaying the cell surface biotinylation assay to detect the remaining surface GluA1  
881 receptors after cLTD treatment. Cells were treated with DMSO or CRT followed by NMDA  
882 application. After the cLTD treatment, cultures were surface biotinylated using sulfo-NHS-SS-biotin  
883 and further processed. Representative Western Blots displaying (b) total and surface GluA1 levels, (d)  
884 PKD and pS916PKD levels, and (f) total and pS845GluA1 levels in biotinylated hippocampal neuronal  
885 cultures. Actin served as a loading control and is absent from the precipitated samples. (c, e, g)  
886 Quantification of data shown in (b,d,f), using densitometry analysis. Data are presented as mean line  
887 density  $\pm$  SEM of treated samples (cLTD and CRT plus cLTD) normalized to the control; each dot  
888 represents one independent culture. Statistical comparison was done by one-way ANOVA with Sidak's  
889 correction. The dotted lines represent the control level. The boxplots show the results of three  
890 independent cultures. Center lines show the medians; box limits indicate the 25th and 75th percentiles;  
891 whiskers extend 1.5 times the interquartile range from the 25th and 75th percentiles, outliers are  
892 represented by dots. The significance of differences was analyzed by a Mann-Whitney test (two-tailed).  
893 \*\*p<0.01, \*\*\*p<0.001, \*\*\*\*p<0.0001.

#### 894 **Fig. 6 PKD activity controls neuronal network activity**

895 (a) Short segments of raw voltage traces before and after CRT treatment und basal conditions (top) and  
896 upon cLTD (bottom). (b) Quantification of the raw interspike interval median of neuronal cultures both  
897 before and after treatment with DMSO or CRT for 10 minutes, followed by treatment with NMDA and  
898 a subsequent 10 min incubation. (c) Interspike interval median of cells treated with 10 min of DMSO  
899 or CRT followed by NMDA application and a subsequent incubation period of 10 min. Data were  
900 normalized for their pre-treatment values. The boxplots show the results of three independent cultures.  
901 Center lines show the medians; box limits indicate the 25th and 75th percentiles; whiskers extend 1.5  
902 times the interquartile range from the 25th and 75th percentiles, outliers are represented by dots. The  
903 significance of differences was by a Wilcoxon matched-pairs signed rank test (two-tailed) (b) or by a  
904 Mann-Whitney test (two-tailed) (c). \*p<0.05, \*\*p<0.01, \*\*\*p<0.001, \*\*\*\*p<0.0001.

905

## Figure 1

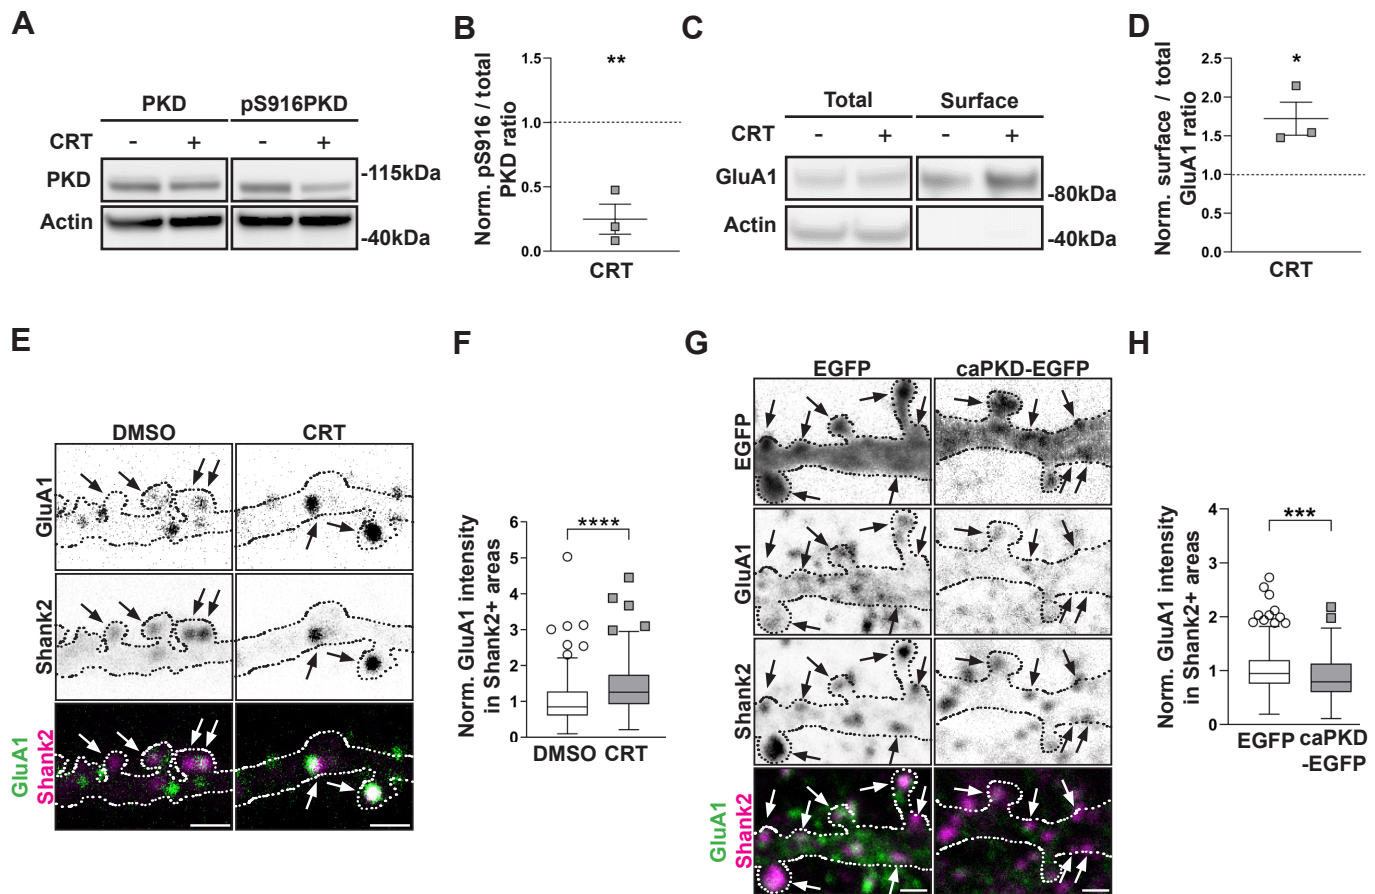

## Figure 2

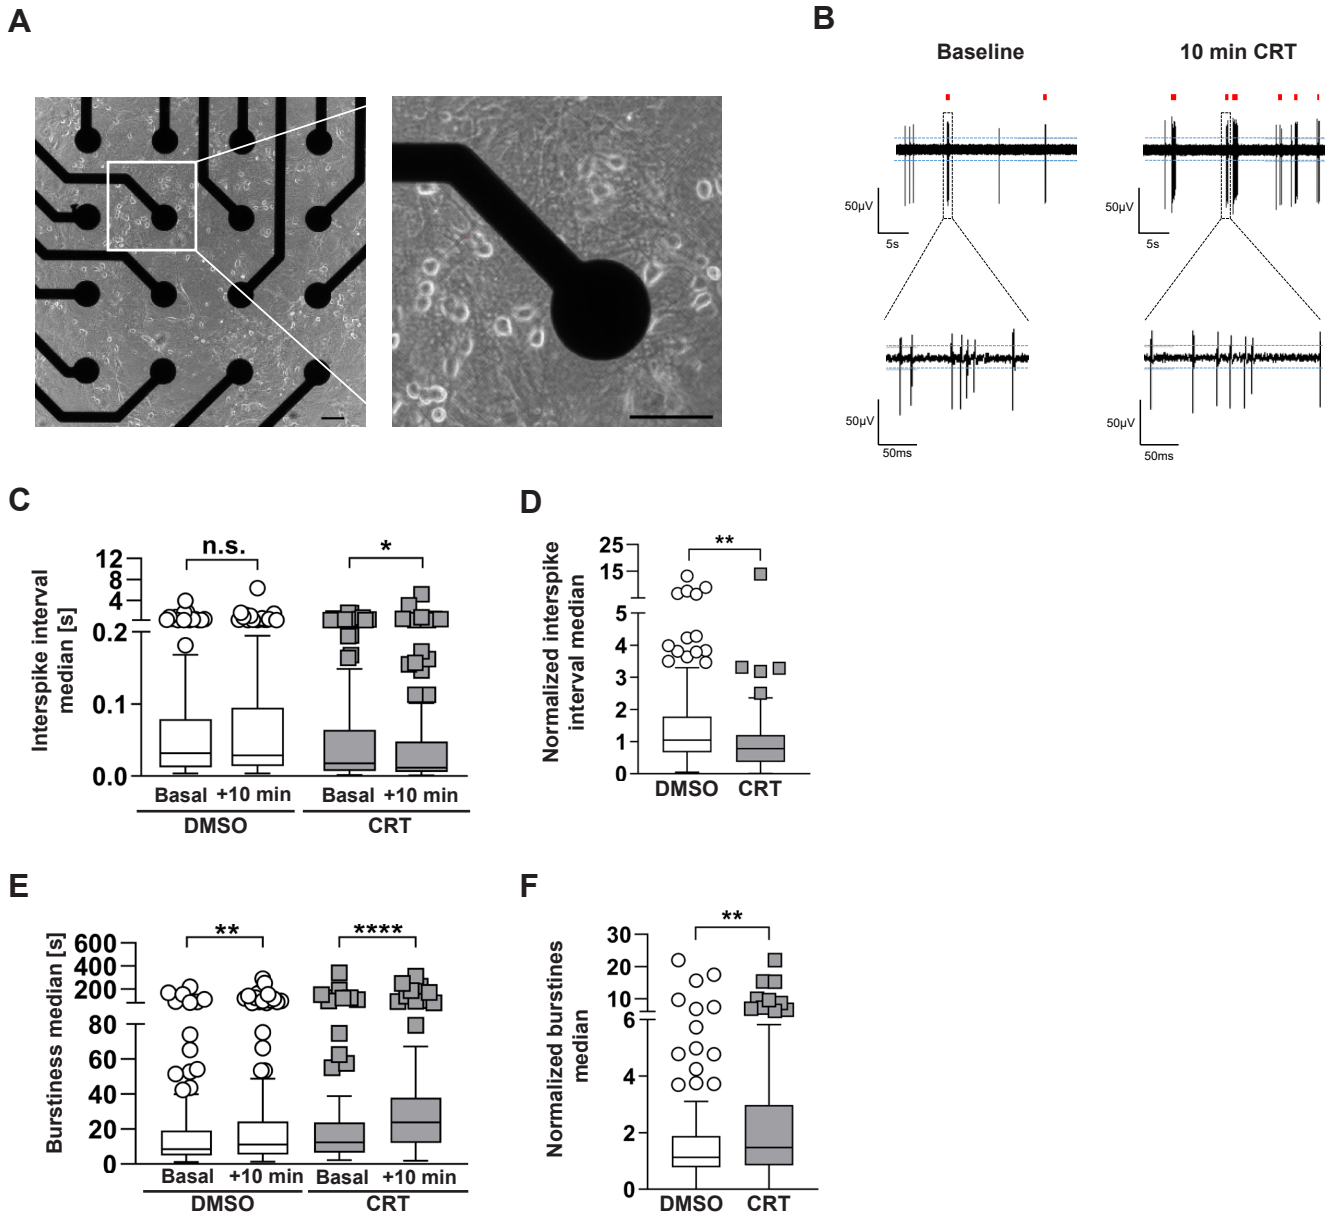



### Figure 3

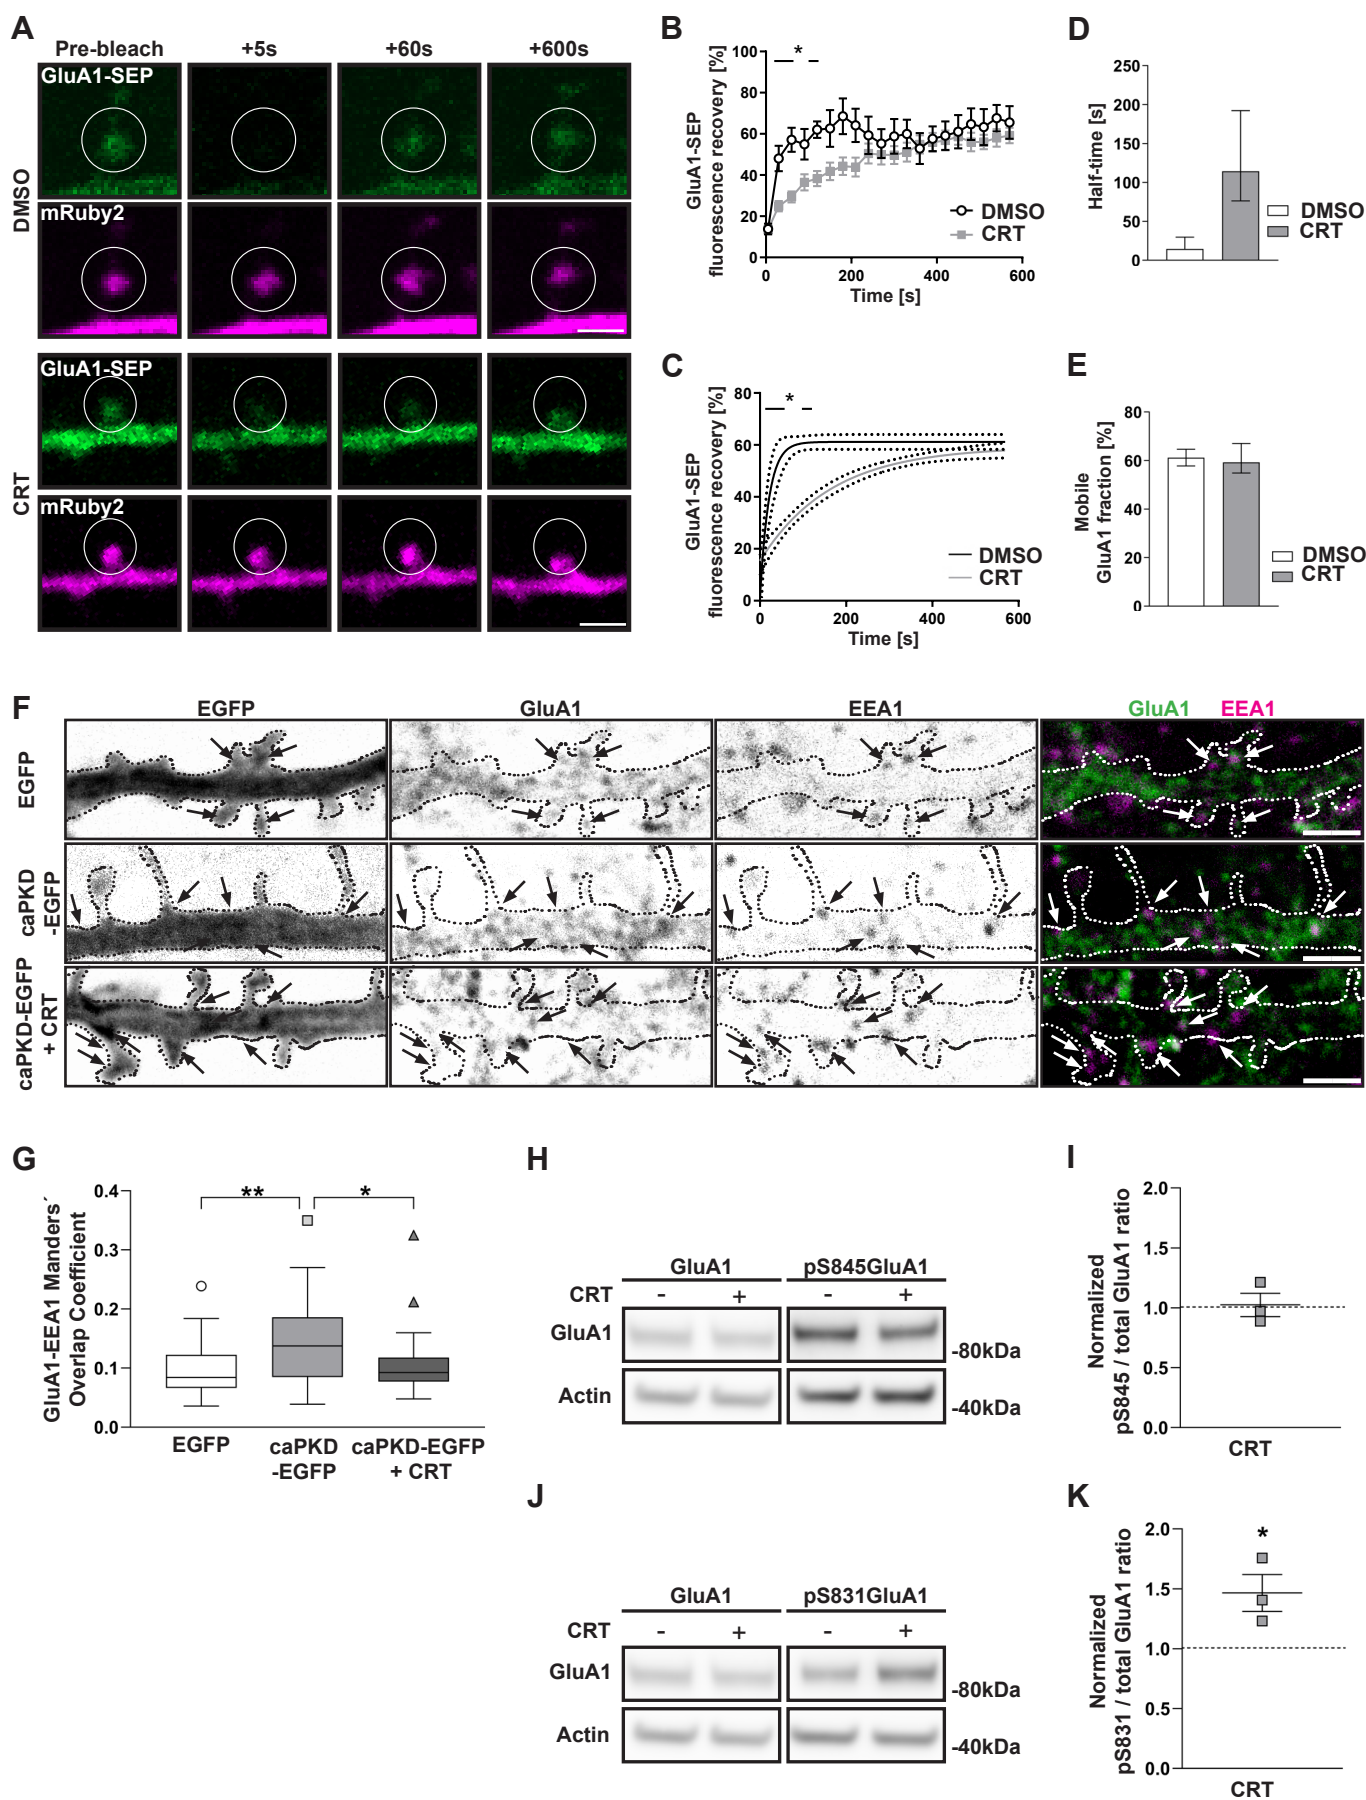

## Figure 4

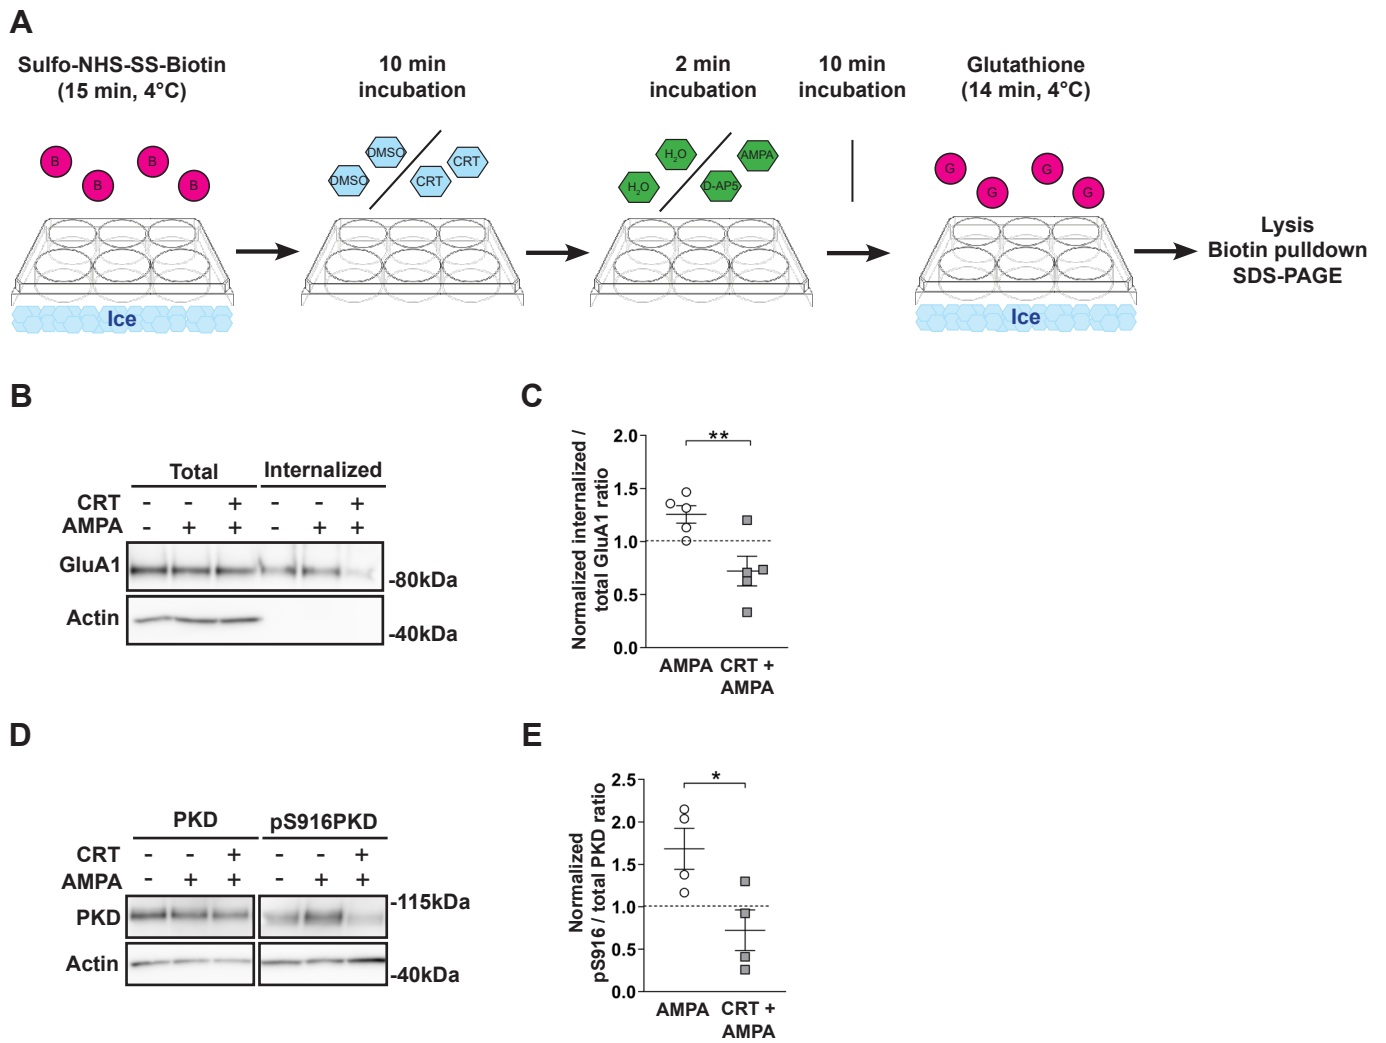

## Figure 5

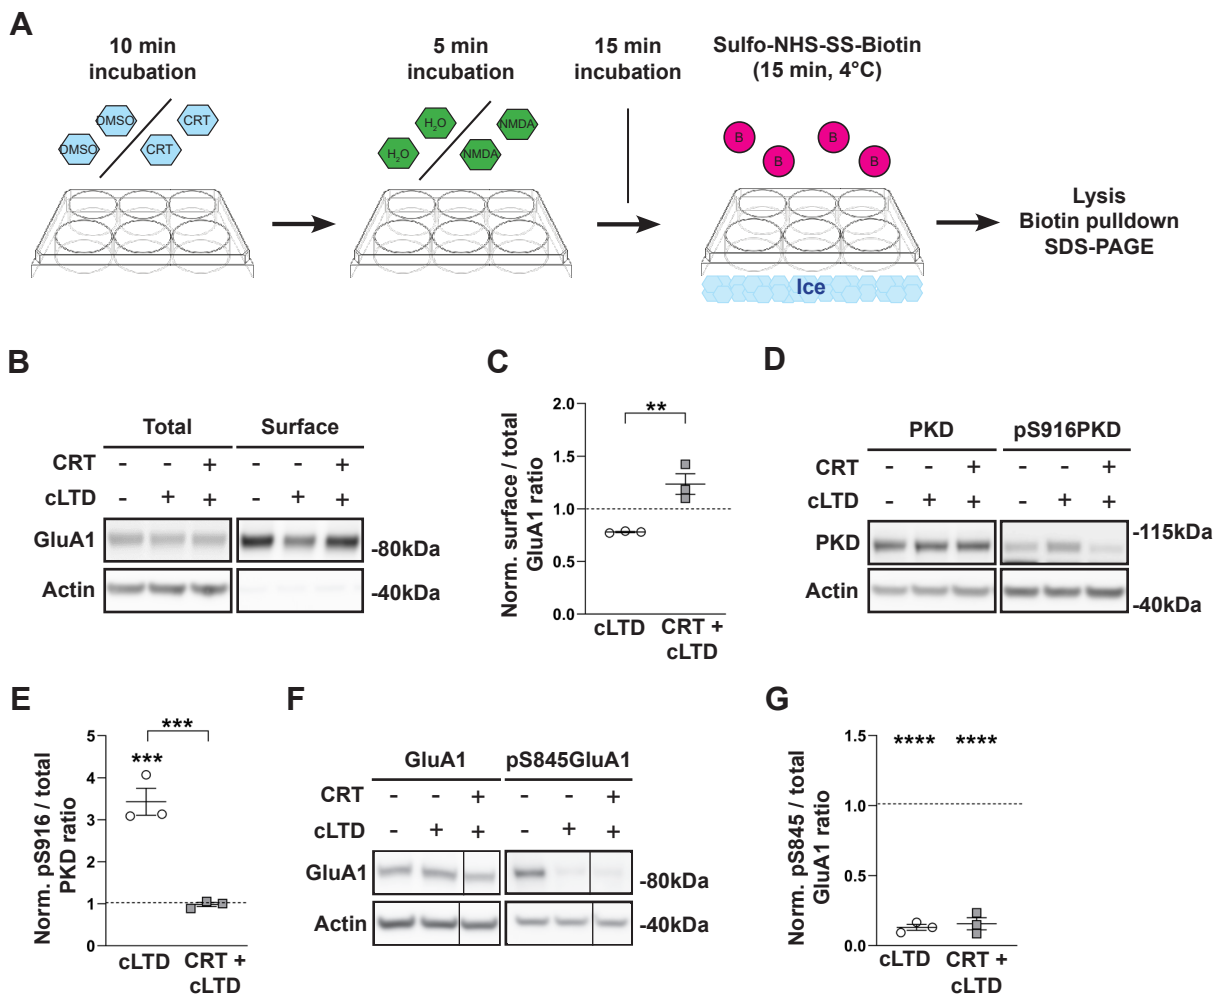

## Figure 6

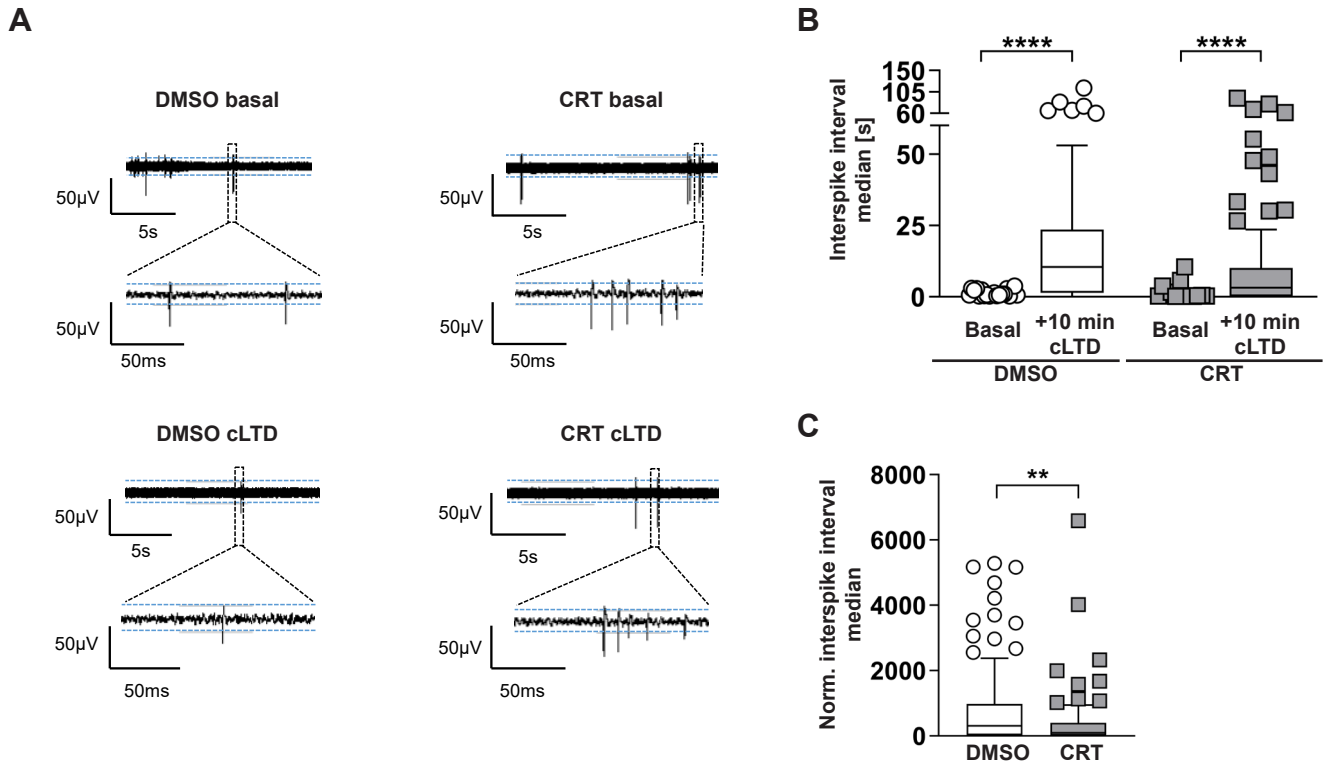

Source: https://www.biorxiv.org/content/10.1101/2020.04.09.033514v3.full.pdf
